# Supplementary material
Source: MDPI journal article supplement (https://www.mdpi.com/2073-4344/13/1/205)
Supplement: s1 [file s1]

# Effect of Modulation and Functionalization of UiO-66 Type MOFs on Their Surface Thermodynamic Properties and Lewis Acid–Base Behavior

Ali Ali-Ahmad <sup>1,2,3</sup>, Tayssir Hamieh <sup>1,4,\*</sup>, Thibault Roques-Carmes <sup>5</sup>, Mohamad Hmadeh <sup>3,\*</sup> and Joumana Toufaily <sup>1,2</sup>

<sup>1</sup> Laboratory of Materials, Catalysis, Environment and Analytical Methods Laboratory (MCEMA), Faculty of Sciences, Lebanese University, Hadath P.O. Box 6573, Lebanon

<sup>2</sup> Laboratory of Applied Studies to the Sustainable Development and Renewable Energies (LEADDER), EDST, Faculty of Sciences, Lebanese University, Hadath 90656, Lebanon

<sup>3</sup> Department of Chemistry, American University of Beirut, Riad El-Solh, P.O. Box 11-0236, Beirut, Lebanon

<sup>4</sup> Faculty of Science and Engineering, Maastricht University, P.O. Box 616, 6200 MD Maastricht, The Netherlands

<sup>5</sup> Laboratoire Réactions et Génie des Procédés, UMR 7274 CNRS, Université de Lorraine, 54000 Nancy, France

\* Correspondence: t.hamieh@maastrichtuniversity.nl (T.H.); mh210@aub.edu.lb (M.H.)

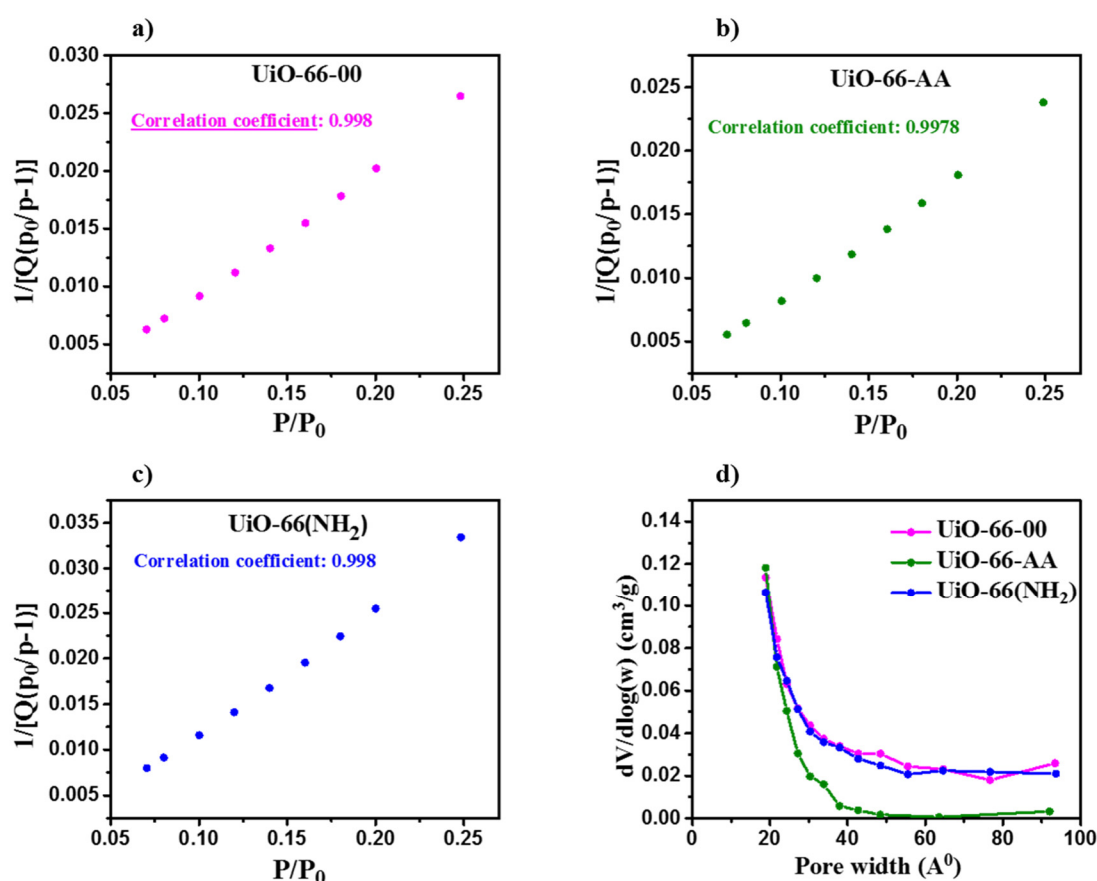

**Figure S1.** BET surface area plot and correlation coefficient: (a) for UiO-66-00, (b) for UiO-66-AA, (c) for UiO-66(NH<sub>2</sub>) and (d) the plot of pore size distribution of MOFs.

**Table S1.** Values of the dispersive component of the surface energy  $\gamma_s^d$  (mJ/m<sup>2</sup>) of UiO-66-00 material as a function of the temperature.

| $\gamma_s^d$ (mJ/m <sup>2</sup> ) (UiO-66-00) |        |        |        |        |        |        |        |        |
|-----------------------------------------------|--------|--------|--------|--------|--------|--------|--------|--------|
| Temperature (K)                               | 313.15 | 323.15 | 333.15 | 343.15 | 353.15 | 363.15 | 373.15 | 383.15 |
| Cylindrical                                   | 22.40  | 21.89  | 21.34  | 20.75  | 20.10  | 19.39  | 18.59  | 17.70  |
| Redlich-Kwong                                 | 34.90  | 33.85  | 32.74  | 31.55  | 30.28  | 28.90  | 27.41  | 25.77  |
| VDW                                           | 21.41  | 20.77  | 20.09  | 19.36  | 18.58  | 17.73  | 16.82  | 15.81  |
| Geometric                                     | 17.35  | 17.15  | 16.94  | 16.70  | 16.42  | 16.10  | 15.73  | 15.29  |
| Spherical                                     | 60.44  | 57.69  | 54.85  | 51.92  | 48.87  | 45.70  | 42.39  | 38.90  |
| Kiselev                                       | 22.23  | 21.58  | 20.90  | 20.17  | 19.38  | 18.53  | 17.60  | 16.57  |
| Hamieh model                                  | 34.99  | 32.34  | 29.73  | 27.17  | 24.67  | 22.21  | 19.79  | 17.43  |
| Dorris-Gray                                   | 40.10  | 38.94  | 37.77  | 36.60  | 35.44  | 34.27  | 33.11  | 31.94  |
| Dorris-Gray-Hamieh                            | 38.35  | 36.75  | 35.15  | 33.55  | 31.95  | 30.35  | 28.75  | 27.16  |

**Table S2.** Values of the dispersive component of the surface energy  $\gamma_s^d$  (mJ/m<sup>2</sup>) of UiO-66-AA material as a function of the temperature.

| $\gamma_s^d$ (mJ/m <sup>2</sup> ) (UiO-66-AA) |        |        |        |        |        |        |        |        |
|-----------------------------------------------|--------|--------|--------|--------|--------|--------|--------|--------|
| Temperature (K)                               | 313.15 | 323.15 | 333.15 | 343.15 | 353.15 | 363.15 | 373.15 | 383.15 |
| Cylindrical                                   | 33.58  | 31.95  | 30.32  | 28.69  | 27.06  | 25.43  | 23.81  | 22.17  |
| Redlich-Kwong                                 | 52.57  | 49.71  | 46.86  | 43.99  | 41.13  | 38.27  | 35.42  | 32.55  |
| VDW                                           | 32.34  | 30.59  | 28.84  | 27.1   | 25.34  | 23.59  | 21.84  | 20.09  |
| Geometric                                     | 26.02  | 25.04  | 24.06  | 23.08  | 22.10  | 21.12  | 20.14  | 19.16  |
| Spherical                                     | 91.02  | 85.01  | 79.00  | 72.99  | 66.98  | 60.97  | 54.96  | 48.95  |
| Kiselev                                       | 33.6   | 31.803 | 30.00  | 28.203 | 26.403 | 24.603 | 22.803 | 21.00  |
| Hamieh model                                  | 51.82  | 47.38  | 42.94  | 38.5   | 34.06  | 28.90  | 25.18  | 20.74  |
| Dorris-Gray                                   | 43.15  | 41.76  | 40.37  | 38.98  | 37.59  | 36.20  | 34.8   | 33.42  |
| Dorris-Gray-Hamieh                            | 52.07  | 50.155 | 48.23  | 46.31  | 44.39  | 42.47  | 40.55  | 38.63  |

**Table S3.** Values of the dispersive component of the surface energy  $\gamma_s^d$  (mJ/m<sup>2</sup>) of UiO-66-FA material as a function of the temperature.

| $\gamma_s^d$ (mJ/m <sup>2</sup> ) (UiO-66-FA) |        |        |        |        |        |        |        |        |
|-----------------------------------------------|--------|--------|--------|--------|--------|--------|--------|--------|
| Temperature (K)                               | 313.15 | 323.15 | 333.15 | 343.15 | 353.15 | 363.15 | 373.15 | 383.15 |
| Cylindrical                                   | 47.31  | 45.42  | 43.48  | 41.48  | 39.40  | 37.24  | 34.97  | 32.57  |
| Redlich-Kwong                                 | 73.64  | 70.20  | 66.69  | 63.08  | 59.38  | 55.56  | 51.61  | 47.48  |
| VDW                                           | 45.16  | 42.98  | 40.90  | 38.69  | 36.42  | 34.08  | 31.65  | 29.13  |
| Geometric                                     | 36.57  | 35.52  | 34.43  | 33.29  | 32.10  | 30.84  | 29.49  | 28.02  |
| Spherical                                     | 128.64 | 120.67 | 112.70 | 104.69 | 96.65  | 88.57  | 80.44  | 72.23  |
| Kiselev                                       | 47.33  | 45.14  | 42.91  | 40.62  | 38.26  | 35.83  | 33.31  | 30.68  |
| Hamieh model                                  | 74.20  | 67.39  | 60.85  | 54.59  | 48.60  | 42.88  | 37.43  | 32.24  |
| Dorris-Gray                                   | 63.13  | 61.27  | 59.41  | 57.56  | 55.70  | 53.84  | 51.99  | 50.13  |
| Dorris-Gray-Hamieh                            | 59.87  | 57.37  | 54.87  | 52.37  | 49.87  | 47.37  | 44.87  | 42.37  |

**Table S4.** Values of the dispersive component of the surface energy  $\gamma_s^d$  (mJ/m<sup>2</sup>) of UiO-66(NH<sub>2</sub>) material as a function of the temperature.

|                    | $\gamma_s^d$ (mJ/m <sup>2</sup> ) (UiO-66(NH <sub>2</sub> )) |        |        |        |        |        |        |        |
|--------------------|--------------------------------------------------------------|--------|--------|--------|--------|--------|--------|--------|
| Temperature (K)    | 313.15                                                       | 323.15 | 333.15 | 343.15 | 353.15 | 363.15 | 373.15 | 383.15 |
| Cylindrical        | 124.6                                                        | 121.00 | 117.34 | 113.68 | 110.02 | 106.36 | 102.69 | 99.03  |
| Redlich-Kwong      | 196.55                                                       | 189.29 | 182.04 | 174.79 | 167.54 | 160.28 | 153.03 | 145.78 |
| VDW                | 120.38                                                       | 115.95 | 111.52 | 107.08 | 102.65 | 98.21  | 93.78  | 89.35  |
| Geometric          | 96.17                                                        | 94.53  | 92.90  | 91.26  | 89.62  | 87.98  | 86.34  | 84.71  |
| Spherical          | 340.95                                                       | 323.86 | 306.77 | 289.68 | 272.59 | 255.5  | 238.41 | 221.32 |
| Kiselev            | 124.22                                                       | 119.80 | 115.38 | 110.96 | 106.54 | 102.12 | 97.70  | 93.27  |
| Hamieh model       | 193.54                                                       | 179.65 | 165.75 | 151.85 | 137.96 | 124.06 | 110.17 | 96.27  |
| Dorris-Gray        | 69.44                                                        | 67.39  | 65.351 | 63.316 | 61.27  | 59.224 | 57.189 | 55.143 |
| Dorris-Gray-Hamieh | 200.77                                                       | 192.70 | 184.63 | 176.56 | 168.49 | 160.42 | 152.35 | 144.28 |

**Table S5.** Values (in kJ/mol) of the specific free energy ( $-\Delta G_a^{sp}(T)$ ) of the various polar solvents adsorbed on UiO-66-00 material surface for different temperatures by using the various IGC models and methods.

| Kiselev |                 |            |       |       |              |         |         |
|---------|-----------------|------------|-------|-------|--------------|---------|---------|
| T(K)    | Dichloromethane | Chloroform | THF   | Ether | Acetonitrile | Toluene | Benzene |
| 493.15  | 1.36            | 1.41       | 27.56 | 0.53  | 7.70         | 6.74    | 2.15    |
| 498.15  | 1.50            | 1.54       | 28.37 | 1.02  | 8.18         | 6.90    | 2.19    |
| 503.15  | 1.64            | 1.67       | 29.18 | 1.51  | 8.65         | 7.05    | 2.23    |
| 508.15  | 1.78            | 1.80       | 29.99 | 2.00  | 9.13         | 7.21    | 2.27    |
| 513.15  | 1.92            | 1.94       | 30.80 | 2.49  | 9.60         | 7.36    | 2.31    |
| 518.15  | 2.06            | 2.07       | 31.61 | 2.98  | 10.08        | 7.52    | 2.35    |
| 523.15  | 2.20            | 2.20       | 32.42 | 3.47  | 10.55        | 7.67    | 2.39    |
| 528.15  | 2.34            | 2.33       | 33.23 | 3.96  | 11.03        | 7.83    | 2.43    |
| 533.15  | 2.48            | 2.47       | 34.04 | 4.45  | 11.50        | 7.98    | 2.47    |
| 538.15  | 2.62            | 2.60       | 34.85 | 4.94  | 11.98        | 8.14    | 2.51    |
| 543.15  | 2.75            | 2.73       | 35.66 | 5.43  | 12.45        | 8.29    | 2.55    |

| Spherical |                 |            |       |       |              |         |         |
|-----------|-----------------|------------|-------|-------|--------------|---------|---------|
| T(K)      | Dichloromethane | Chloroform | THF   | Ether | Acetonitrile | Toluene | Benzene |
| 493.15    | 30.90           | 23.51      | 22.74 | 6.09  | 3.98         | 2.90    | 0.97    |
| 498.15    | 31.48           | 23.88      | 33.08 | 6.69  | 4.48         | 2.97    | 0.99    |
| 503.15    | 32.06           | 24.25      | 32.86 | 7.29  | 4.98         | 3.04    | 1.01    |
| 508.15    | 32.64           | 24.62      | 32.64 | 7.89  | 5.48         | 3.11    | 1.03    |
| 513.15    | 33.22           | 24.99      | 32.42 | 8.49  | 5.98         | 3.18    | 1.05    |
| 518.15    | 33.80           | 25.36      | 32.20 | 9.09  | 6.48         | 3.25    | 1.07    |
| 523.15    | 34.38           | 25.73      | 31.98 | 9.69  | 6.98         | 3.32    | 1.09    |
| 528.15    | 34.95           | 26.11      | 31.76 | 10.29 | 7.48         | 3.39    | 1.11    |
| 533.15    | 35.53           | 26.48      | 31.54 | 10.89 | 7.98         | 3.46    | 1.13    |
| 538.15    | 36.11           | 26.85      | 31.32 | 11.49 | 8.48         | 3.53    | 1.15    |
| 543.15    | 36.69           | 27.22      | 31.10 | 12.09 | 8.98         | 3.60    | 1.17    |

| Geometric |                 |            |      |       |              |         |         |
|-----------|-----------------|------------|------|-------|--------------|---------|---------|
| T(K)      | Dichloromethane | Chloroform | THF  | Ether | Acetonitrile | Toluene | Benzene |
| 493.15    | 2.14            | 1.86       | 2.98 | 1.03  | 7.68         | 1.99    | 0.58    |
| 498.15    | 2.47            | 2.16       | 3.45 | 1.32  | 8.00         | 2.08    | 0.59    |

|        |      |      |      |      |       |      |      |
|--------|------|------|------|------|-------|------|------|
| 503.15 | 2.79 | 2.45 | 3.93 | 1.61 | 8.32  | 2.16 | 0.60 |
| 508.15 | 3.12 | 2.75 | 4.40 | 1.90 | 8.64  | 2.25 | 0.61 |
| 513.15 | 3.45 | 3.04 | 4.88 | 2.19 | 8.96  | 2.33 | 0.62 |
| 518.15 | 3.78 | 3.34 | 5.35 | 2.48 | 9.28  | 2.41 | 0.63 |
| 523.15 | 4.11 | 3.63 | 5.83 | 2.77 | 9.60  | 2.50 | 0.64 |
| 528.15 | 4.43 | 3.93 | 6.30 | 3.06 | 9.92  | 2.58 | 0.65 |
| 533.15 | 4.76 | 4.22 | 6.78 | 3.35 | 10.24 | 2.66 | 0.66 |
| 538.15 | 5.09 | 4.52 | 7.25 | 3.64 | 10.56 | 2.75 | 0.67 |
| 543.15 | 5.42 | 4.81 | 7.73 | 3.93 | 10.87 | 2.83 | 0.67 |

## VDW

| T(K)   | Dichloromethane | Chloroform | THF   | Ether | Acetonitrile | Toluene | Benzene |
|--------|-----------------|------------|-------|-------|--------------|---------|---------|
| 493.15 | 18.70           | 25.55      | 6.40  | 14.24 | 2.16         | 5.02    | 0.20    |
| 498.15 | 19.14           | 25.97      | 7.40  | 14.73 | 2.40         | 5.35    | 0.24    |
| 503.15 | 19.58           | 26.39      | 8.40  | 15.22 | 2.65         | 5.68    | 0.27    |
| 508.15 | 20.01           | 26.82      | 9.40  | 15.70 | 2.89         | 6.02    | 0.31    |
| 513.15 | 20.45           | 27.24      | 10.40 | 16.19 | 3.13         | 6.35    | 0.34    |
| 518.15 | 20.89           | 27.66      | 11.40 | 16.68 | 3.37         | 6.68    | 0.38    |
| 523.15 | 21.32           | 28.09      | 12.40 | 17.17 | 3.61         | 7.01    | 0.41    |
| 528.15 | 21.76           | 28.51      | 13.40 | 17.65 | 3.85         | 7.35    | 0.45    |
| 533.15 | 22.19           | 28.93      | 14.40 | 18.14 | 4.09         | 7.68    | 0.49    |
| 538.15 | 22.63           | 29.36      | 15.40 | 18.63 | 4.33         | 8.01    | 0.52    |
| 543.15 | 23.07           | 29.78      | 16.40 | 19.12 | 4.57         | 8.34    | 0.56    |

## Redlich-Kwong

| T(K)   | Dichloromethane | Chloroform | THF   | Ether | Acetonitrile | Toluene | Benzene |
|--------|-----------------|------------|-------|-------|--------------|---------|---------|
| 493.15 | 5.15            | 6.28       | 35.66 | 1.71  | 13.88        | 3.05    | 4.01    |
| 498.15 | 5.45            | 6.51       | 36.71 | 2.29  | 14.24        | 3.23    | 4.08    |
| 503.15 | 5.75            | 6.74       | 37.76 | 2.86  | 14.60        | 3.42    | 4.14    |
| 508.15 | 6.05            | 6.97       | 38.81 | 3.44  | 14.96        | 3.60    | 4.21    |
| 513.15 | 6.35            | 7.20       | 39.86 | 4.01  | 15.32        | 3.79    | 4.27    |
| 518.15 | 6.65            | 7.43       | 40.91 | 4.59  | 15.68        | 3.97    | 4.34    |
| 523.15 | 6.95            | 7.66       | 41.96 | 5.16  | 16.04        | 4.16    | 4.40    |
| 528.15 | 7.25            | 7.88       | 43.01 | 5.74  | 16.40        | 4.34    | 4.47    |
| 533.15 | 7.55            | 8.11       | 44.06 | 6.31  | 16.76        | 4.53    | 4.53    |
| 538.15 | 7.85            | 8.34       | 45.11 | 6.89  | 17.12        | 4.71    | 4.60    |
| 543.15 | 8.15            | 8.57       | 46.16 | 7.46  | 17.48        | 4.90    | 4.66    |

## Cylindrical

| T(K)   | Dichloromethane | Chloroform | THF   | Ether | Acetonitrile | Toluene | Benzene |
|--------|-----------------|------------|-------|-------|--------------|---------|---------|
| 493.15 | 1.41            | 1.37       | 24.17 | 2.14  | 4.25         | 6.44    | 2.85    |
| 498.15 | 1.53            | 1.49       | 24.86 | 2.60  | 4.69         | 6.58    | 2.89    |
| 503.15 | 1.64            | 1.60       | 25.56 | 3.06  | 5.13         | 6.71    | 2.92    |
| 508.15 | 1.76            | 1.71       | 26.25 | 3.52  | 5.57         | 6.85    | 2.96    |
| 513.15 | 1.88            | 1.83       | 26.94 | 3.98  | 6.01         | 6.98    | 2.99    |
| 518.15 | 2.00            | 1.94       | 27.64 | 4.44  | 6.45         | 7.12    | 3.03    |
| 523.15 | 2.12            | 2.05       | 28.33 | 4.90  | 6.89         | 7.25    | 3.07    |
| 528.15 | 2.23            | 2.17       | 29.02 | 5.36  | 7.33         | 7.39    | 3.10    |
| 533.15 | 2.35            | 2.28       | 29.72 | 5.82  | 7.77         | 7.52    | 3.14    |
| 538.15 | 2.47            | 2.40       | 30.41 | 6.28  | 8.21         | 7.66    | 3.18    |
| 543.15 | 2.59            | 2.51       | 31.10 | 6.74  | 8.65         | 7.79    | 3.21    |

| Hamieh model |                 |            |       |       |              |         |         |
|--------------|-----------------|------------|-------|-------|--------------|---------|---------|
| T(K)         | Dichloromethane | Chloroform | THF   | Ether | Acetonitrile | Toluene | Benzene |
| 493.15       | 6.96            | 4.59       | 34.97 | 7.81  | 11.31        | 8.27    | 2.19    |
| 498.15       | 7.17            | 4.78       | 35.78 | 8.15  | 11.60        | 8.41    | 2.24    |
| 503.15       | 7.39            | 4.96       | 36.58 | 8.48  | 11.88        | 8.56    | 2.29    |
| 508.15       | 7.60            | 5.15       | 37.39 | 8.82  | 12.16        | 8.70    | 2.34    |
| 513.15       | 7.82            | 5.33       | 38.20 | 9.15  | 12.44        | 8.84    | 2.39    |
| 518.15       | 8.03            | 5.52       | 39.01 | 9.49  | 12.72        | 8.99    | 2.44    |
| 523.15       | 8.25            | 5.70       | 39.81 | 9.82  | 13.00        | 9.13    | 2.49    |
| 528.15       | 8.46            | 5.89       | 40.62 | 10.16 | 13.28        | 9.27    | 2.54    |
| 533.15       | 8.68            | 6.07       | 41.43 | 10.49 | 13.57        | 9.41    | 2.59    |
| 538.15       | 8.89            | 6.26       | 42.24 | 10.83 | 13.85        | 9.56    | 2.64    |
| 543.15       | 9.11            | 6.44       | 43.04 | 11.16 | 14.13        | 9.70    | 2.69    |

| Topological index |                 |            |       |       |              |         |         |
|-------------------|-----------------|------------|-------|-------|--------------|---------|---------|
| T(K)              | Dichloromethane | Chloroform | THF   | Ether | Acetonitrile | Toluene | Benzene |
| 493.15            | 9.26            | 6.45       | 15.92 | 3.94  | 20.76        | 1.27    | 2.25    |
| 498.15            | 9.25            | 6.43       | 15.72 | 3.91  | 20.26        | 1.20    | 2.26    |
| 503.15            | 9.25            | 6.42       | 15.52 | 3.87  | 20.10        | 1.12    | 2.27    |
| 508.15            | 9.24            | 6.40       | 15.32 | 3.84  | 20.20        | 1.05    | 2.28    |
| 513.15            | 9.23            | 6.38       | 15.12 | 3.80  | 19.47        | 0.97    | 2.29    |
| 518.15            | 9.22            | 6.37       | 14.92 | 3.77  | 19.43        | 0.90    | 2.30    |
| 523.15            | 9.22            | 6.35       | 14.72 | 3.73  | 19.14        | 0.82    | 2.31    |
| 528.15            | 9.21            | 6.33       | 14.52 | 3.70  | 19.26        | 0.75    | 2.32    |
| 533.15            | 9.20            | 6.32       | 14.32 | 3.66  | 18.90        | 0.67    | 2.33    |
| 538.15            | 9.19            | 6.30       | 14.12 | 3.63  | 18.82        | 0.60    | 2.34    |
| 543.15            | 9.19            | 6.28       | 13.92 | 3.59  | 18.62        | 0.52    | 2.35    |

| Deformation polarizability |                 |            |       |       |              |         |         |
|----------------------------|-----------------|------------|-------|-------|--------------|---------|---------|
| T(K)                       | Dichloromethane | Chloroform | THF   | Ether | Acetonitrile | Toluene | Benzene |
| 493.15                     | 3.50            | 1.98       | 23.21 | 2.60  | 21.82        | 1.25    | 1.67    |
| 498.15                     | 3.49            | 1.97       | 23.06 | 2.53  | 21.28        | 1.14    | 1.67    |
| 503.15                     | 3.47            | 1.96       | 22.90 | 2.45  | 21.14        | 1.01    | 1.67    |
| 508.15                     | 3.45            | 1.94       | 22.75 | 2.38  | 21.29        | 1.05    | 1.67    |
| 513.15                     | 3.43            | 1.93       | 22.59 | 2.30  | 20.47        | 0.97    | 1.66    |
| 518.15                     | 3.42            | 1.91       | 22.44 | 2.23  | 20.44        | 0.62    | 1.66    |
| 523.15                     | 3.40            | 1.90       | 22.28 | 2.15  | 20.12        | 0.67    | 1.66    |
| 528.15                     | 3.38            | 1.89       | 22.13 | 2.08  | 20.27        | 0.94    | 1.66    |
| 533.15                     | 3.36            | 1.87       | 21.97 | 2.00  | 19.90        | 0.81    | 1.65    |
| 538.15                     | 3.35            | 1.86       | 21.82 | 1.93  | 19.80        | 0.52    | 1.65    |
| 543.15                     | 3.33            | 1.84       | 21.66 | 1.85  | 19.56        | 0.33    | 1.65    |

| Vapor pressure |                 |            |       |       |              |         |         |
|----------------|-----------------|------------|-------|-------|--------------|---------|---------|
| T(K)           | Dichloromethane | Chloroform | THF   | Ether | Acetonitrile | Toluene | Benzene |
| 493.15         | 2.83            | 2.11       | 20.12 | 20.76 | 20.46        | 4.60    | 0.96    |
| 498.15         | 2.81            | 2.10       | 20.01 | 20.65 | 20.36        | 4.58    | 0.96    |
| 503.15         | 2.79            | 2.09       | 19.90 | 20.54 | 20.27        | 4.55    | 0.96    |
| 508.15         | 2.77            | 2.08       | 19.79 | 20.43 | 20.18        | 4.53    | 0.95    |
| 513.15         | 2.75            | 2.07       | 19.68 | 20.32 | 20.09        | 4.51    | 0.95    |

|        |      |      |       |       |       |      |      |
|--------|------|------|-------|-------|-------|------|------|
| 518.15 | 2.73 | 2.06 | 19.57 | 20.21 | 20.00 | 4.48 | 0.95 |
| 523.15 | 2.71 | 2.05 | 19.46 | 20.10 | 19.91 | 4.46 | 0.95 |
| 528.15 | 2.69 | 2.04 | 19.35 | 19.99 | 19.81 | 4.43 | 0.95 |
| 533.15 | 2.67 | 2.03 | 19.24 | 19.88 | 19.72 | 4.41 | 0.95 |
| 538.15 | 2.65 | 2.02 | 19.13 | 19.77 | 19.63 | 4.38 | 0.95 |
| 543.15 | 2.63 | 2.01 | 19.02 | 19.66 | 19.54 | 4.36 | 0.95 |

**Table S6.** Values (in kJ/mol) of the specific free energy ( $-\Delta G_a^{sp}(T)$ ) of the various polar solvents adsorbed on UiO-66-AA material surface for different temperatures by using the various IGC models and methods.

| Kiselev |       |            |        |        |              |         |         |
|---------|-------|------------|--------|--------|--------------|---------|---------|
| T (K)   | DCM   | Chloroform | THF    | Ether  | Acetonitrile | Toluene | Benzene |
| 493.15  | 7.053 | 6.744      | 11.362 | 25.750 | −0.076       | 0.042   | 2.464   |
| 498.15  | 6.938 | 6.631      | 11.198 | 25.429 | −0.228       | −0.058  | 2.454   |
| 503.15  | 6.823 | 6.518      | 11.034 | 25.107 | −0.379       | −0.158  | 2.443   |
| 508.15  | 6.708 | 6.405      | 10.870 | 24.786 | −0.531       | −0.258  | 2.433   |
| 513.15  | 6.593 | 6.292      | 10.706 | 24.464 | −0.682       | −0.358  | 2.422   |
| 518.15  | 6.478 | 6.179      | 10.542 | 24.143 | −0.834       | −0.458  | 2.412   |
| 523.15  | 6.363 | 6.066      | 10.378 | 23.821 | −0.985       | −0.558  | 2.401   |
| 528.15  | 6.248 | 5.953      | 10.214 | 23.500 | −1.137       | −0.658  | 2.391   |
| 533.15  | 6.133 | 5.840      | 10.050 | 23.178 | −1.288       | −0.758  | 2.380   |
| 538.15  | 6.018 | 5.727      | 9.886  | 22.857 | −1.440       | −0.858  | 2.370   |
| 543.15  | 5.903 | 5.614      | 9.722  | 22.535 | −1.591       | −0.958  | 2.359   |

  

| Spherical |       |            |        |        |              |         |         |
|-----------|-------|------------|--------|--------|--------------|---------|---------|
| T (K)     | DCM   | Chloroform | THF    | Ether  | Acetonitrile | Toluene | Benzene |
| 493.15    | 6.471 | 5.393      | 10.903 | 10.903 | 1.135        | −0.669  | −1.011  |
| 498.15    | 6.418 | 5.348      | 10.654 | 10.654 | 0.669        | −0.726  | −1.067  |
| 503.15    | 6.365 | 5.303      | 10.405 | 10.405 | 0.203        | −0.784  | −1.123  |
| 508.15    | 6.312 | 5.258      | 10.156 | 10.156 | −0.263       | −0.841  | −1.179  |
| 513.15    | 6.259 | 5.213      | 9.907  | 9.907  | −0.729       | −0.899  | −1.235  |
| 518.15    | 6.206 | 5.168      | 9.658  | 9.658  | −1.195       | −0.956  | −1.291  |
| 523.15    | 6.153 | 5.123      | 9.409  | 9.409  | −1.661       | −1.014  | −1.347  |
| 528.15    | 6.100 | 5.078      | 9.160  | 9.160  | −2.127       | −1.071  | −1.403  |
| 533.15    | 6.047 | 5.033      | 8.911  | 8.911  | −2.593       | −1.129  | −1.459  |
| 538.15    | 5.994 | 4.988      | 8.662  | 8.662  | −3.059       | −1.186  | −1.515  |
| 543.15    | 5.941 | 4.943      | 8.413  | 8.413  | −3.525       | −1.244  | −1.571  |

  

| Geometric |       |            |        |       |              |         |         |
|-----------|-------|------------|--------|-------|--------------|---------|---------|
| T (K)     | DCM   | Chloroform | THF    | Ether | Acetonitrile | Toluene | Benzene |
| 493.15    | 7.364 | 11.859     | 11.712 | 8.173 | 2.755        | −0.366  | 3.558   |
| 498.15    | 7.303 | 11.951     | 11.536 | 7.858 | 2.415        | −0.383  | 3.574   |
| 503.15    | 7.243 | 12.044     | 11.360 | 7.543 | 2.074        | −0.400  | 3.590   |
| 508.15    | 7.182 | 12.136     | 11.184 | 7.228 | 1.734        | −0.417  | 3.606   |
| 513.15    | 7.122 | 12.229     | 11.008 | 6.913 | 1.393        | −0.434  | 3.622   |
| 518.15    | 7.061 | 12.321     | 10.832 | 6.598 | 1.053        | −0.451  | 3.638   |
| 523.15    | 7.001 | 12.414     | 10.656 | 6.283 | 0.712        | −0.468  | 3.654   |
| 528.15    | 6.940 | 12.506     | 10.480 | 5.968 | 0.372        | −0.485  | 3.670   |
| 533.15    | 6.880 | 12.599     | 10.304 | 5.653 | 0.031        | −0.502  | 3.686   |

| 538.15        | 6.819 | 12.691     | 10.128 | 5.338  | −0.309       | −0.519  | 3.702   |
|---------------|-------|------------|--------|--------|--------------|---------|---------|
| 543.15        | 6.759 | 12.784     | 9.952  | 5.023  | −0.650       | −0.536  | 3.718   |
| VDW           |       |            |        |        |              |         |         |
| T (K)         | DCM   | Chloroform | THF    | Ether  | Acetonitrile | Toluene | Benzene |
| 493.15        | 6.607 | −1.037     | 3.661  | 11.389 | 2.500        | 0.030   | −0.761  |
| 498.15        | 6.571 | −1.355     | 3.474  | 11.152 | 2.218        | −0.004  | −0.793  |
| 503.15        | 6.535 | −1.673     | 3.287  | 10.914 | 1.935        | −0.038  | −0.824  |
| 508.15        | 6.499 | −1.991     | 3.100  | 10.677 | 1.653        | −0.072  | −0.856  |
| 513.15        | 6.463 | −2.309     | 2.913  | 10.439 | 1.370        | −0.106  | −0.887  |
| 518.15        | 6.427 | −2.627     | 2.726  | 10.202 | 1.088        | −0.140  | −0.919  |
| 523.15        | 6.391 | −2.945     | 2.539  | 9.964  | 0.805        | −0.174  | −0.950  |
| 528.15        | 6.355 | −3.263     | 2.352  | 9.727  | 0.523        | −0.208  | −0.982  |
| 533.15        | 6.319 | −3.581     | 2.165  | 9.489  | 0.240        | −0.242  | −1.013  |
| 538.15        | 6.283 | −3.899     | 1.978  | 9.252  | −0.042       | −0.276  | −1.045  |
| 543.15        | 6.247 | −4.217     | 1.791  | 9.014  | −0.325       | −0.310  | −1.076  |
| Redlich-kwong |       |            |        |        |              |         |         |
| T (K)         | DCM   | Chloroform | THF    | Ether  | Acetonitrile | Toluene | Benzene |
| 493.15        | 6.681 | −0.976     | 3.707  | 0.412  | 2.483        | 0.026   | −0.760  |
| 498.15        | 6.647 | −1.293     | 3.520  | −0.035 | 2.200        | −0.008  | −0.792  |
| 503.15        | 6.612 | −1.609     | 3.334  | −0.481 | 1.917        | −0.042  | −0.823  |
| 508.15        | 6.578 | −1.926     | 3.147  | −0.928 | 1.634        | −0.076  | −0.855  |
| 513.15        | 6.543 | −2.242     | 2.961  | −1.374 | 1.351        | −0.110  | −0.886  |
| 518.15        | 6.509 | −2.559     | 2.774  | −1.821 | 1.068        | −0.144  | −0.918  |
| 523.15        | 6.474 | −2.875     | 2.588  | −2.267 | 0.785        | −0.178  | −0.949  |
| 528.15        | 6.440 | −3.192     | 2.401  | −2.714 | 0.502        | −0.212  | −0.981  |
| 533.15        | 6.405 | −3.508     | 2.215  | −3.160 | 0.219        | −0.246  | −1.012  |
| 538.15        | 6.371 | −3.825     | 2.028  | −3.607 | −0.064       | −0.280  | −1.044  |
| 543.15        | 6.336 | −4.141     | 1.842  | −4.053 | −0.347       | −0.314  | −1.075  |

**Table S7.** Values (in kJ/mol) of the specific free energy ( $-\Delta G_a^{sp}(T)$ ) of the various polar solvents adsorbed on UiO-66-FA material surface for different temperatures by using the various IGC models and methods.

| Cylindrical  |       |            |        |        |              |         |         |
|--------------|-------|------------|--------|--------|--------------|---------|---------|
| T (K)        | DCM   | Chloroform | THF    | Ether  | Acetonitrile | Toluene | Benzene |
| 493.15       | 7.705 | 4.747      | 3.933  | 17.496 | 2.316        | 1.064   | 1.394   |
| 498.15       | 7.634 | 4.581      | 3.785  | 17.119 | 1.955        | 0.995   | 1.376   |
| 503.15       | 7.563 | 4.416      | 3.636  | 16.743 | 1.593        | 0.925   | 1.359   |
| 508.15       | 7.492 | 4.250      | 3.488  | 16.366 | 1.232        | 0.856   | 1.341   |
| 513.15       | 7.421 | 4.085      | 3.339  | 15.990 | 0.870        | 0.786   | 1.324   |
| 518.15       | 7.350 | 3.919      | 3.191  | 15.613 | 0.509        | 0.717   | 1.306   |
| 523.15       | 7.279 | 3.754      | 3.042  | 15.237 | 0.147        | 0.647   | 1.289   |
| 528.15       | 7.208 | 3.588      | 2.894  | 14.860 | −0.214       | 0.578   | 1.271   |
| 533.15       | 7.137 | 3.423      | 2.745  | 14.484 | −0.576       | 0.508   | 1.254   |
| 538.15       | 7.066 | 3.257      | 2.597  | 14.107 | −0.937       | 0.439   | 1.236   |
| 543.15       | 6.995 | 3.092      | 2.448  | 13.731 | −1.299       | 0.369   | 1.219   |
| Hamieh model |       |            |        |        |              |         |         |
| T (K)        | DCM   | Chloroform | THF    | Ether  | Acetonitrile | Toluene | Benzene |
| 493.15       | 3.105 | 3.899      | 24.036 | 26.241 | 35.992       | 1.633   | 0.574   |

|        |       |       |        |        |        |       |       |
|--------|-------|-------|--------|--------|--------|-------|-------|
| 498.15 | 3.065 | 3.879 | 23.800 | 26.017 | 35.959 | 1.573 | 0.572 |
| 503.15 | 3.025 | 3.859 | 23.565 | 25.793 | 35.927 | 1.512 | 0.569 |
| 508.15 | 2.985 | 3.839 | 23.329 | 25.569 | 35.894 | 1.452 | 0.567 |
| 513.15 | 2.945 | 3.819 | 23.094 | 25.345 | 35.862 | 1.391 | 0.564 |
| 518.15 | 2.905 | 3.799 | 22.858 | 25.121 | 35.829 | 1.331 | 0.562 |
| 523.15 | 2.865 | 3.779 | 22.623 | 24.897 | 35.797 | 1.270 | 0.559 |
| 528.15 | 2.825 | 3.759 | 22.387 | 24.673 | 35.764 | 1.210 | 0.557 |
| 533.15 | 2.785 | 3.739 | 22.152 | 24.449 | 35.732 | 1.149 | 0.554 |
| 538.15 | 2.745 | 3.719 | 21.916 | 24.225 | 35.699 | 1.089 | 0.552 |
| 543.15 | 2.705 | 3.699 | 21.681 | 24.001 | 35.667 | 1.028 | 0.549 |

#### Topological index

| T (K)  | DCM    | Chloroform | THF    | Ether | Acetonitrile | Toluene | Benzene |
|--------|--------|------------|--------|-------|--------------|---------|---------|
| 493.15 | 10.204 | 9.259      | 14.186 | 3.211 | 6.913        | 5.564   | 1.902   |
| 498.15 | 10.144 | 9.220      | 13.987 | 3.023 | 6.571        | 5.554   | 1.897   |
| 503.15 | 10.085 | 9.180      | 13.787 | 2.835 | 6.229        | 5.543   | 1.892   |
| 508.15 | 10.025 | 9.141      | 13.588 | 2.647 | 5.887        | 5.533   | 1.887   |
| 513.15 | 9.966  | 9.101      | 13.388 | 2.459 | 5.545        | 5.522   | 1.882   |
| 518.15 | 9.906  | 9.062      | 13.189 | 2.271 | 5.203        | 5.512   | 1.877   |
| 523.15 | 9.847  | 9.022      | 12.989 | 2.083 | 4.861        | 5.501   | 1.872   |
| 528.15 | 9.787  | 8.983      | 12.790 | 1.895 | 4.519        | 5.491   | 1.867   |
| 533.15 | 9.728  | 8.943      | 12.590 | 1.707 | 4.177        | 5.480   | 1.862   |
| 538.15 | 9.668  | 8.904      | 12.391 | 1.519 | 3.835        | 5.470   | 1.857   |
| 543.15 | 9.609  | 8.864      | 12.191 | 1.331 | 3.493        | 5.459   | 1.852   |

#### Deformation polarizability

| T (K)  | DCM   | Chloroform | THF    | Ether | Acetonitrile | Toluene | Benzene |
|--------|-------|------------|--------|-------|--------------|---------|---------|
| 493.15 | 4.503 | 7.184      | 15.757 | 3.848 | 7.994        | 3.438   | 0.324   |
| 498.15 | 4.492 | 7.179      | 15.453 | 3.644 | 7.569        | 3.410   | 0.303   |
| 503.15 | 4.482 | 7.173      | 15.149 | 3.439 | 7.145        | 3.382   | 0.282   |
| 508.15 | 4.471 | 7.168      | 14.845 | 3.235 | 6.720        | 3.354   | 0.261   |
| 513.15 | 4.461 | 7.162      | 14.541 | 3.030 | 6.296        | 3.326   | 0.240   |
| 518.15 | 4.450 | 7.157      | 14.237 | 2.826 | 5.871        | 3.298   | 0.219   |
| 523.15 | 4.440 | 7.151      | 13.933 | 2.621 | 5.447        | 3.270   | 0.198   |
| 528.15 | 4.429 | 7.146      | 13.629 | 2.417 | 5.022        | 3.242   | 0.177   |
| 533.15 | 4.419 | 7.140      | 13.325 | 2.212 | 4.598        | 3.214   | 0.156   |
| 538.15 | 4.408 | 7.135      | 13.021 | 2.008 | 4.173        | 3.186   | 0.135   |
| 543.15 | 4.398 | 7.129      | 12.717 | 1.803 | 3.749        | 3.158   | 0.114   |

#### Vapor pressure

| T (K)  | DCM   | Chloroform | THF    | Ether | Acetonitrile | Toluene | Benzene |
|--------|-------|------------|--------|-------|--------------|---------|---------|
| 493.15 | 3.322 | 1.258      | 12.262 | 3.262 | 1.814        | 1.144   | 3.026   |
| 498.15 | 3.282 | 1.211      | 12.101 | 3.080 | 1.602        | 1.119   | 3.025   |
| 503.15 | 3.241 | 1.164      | 11.939 | 2.897 | 1.390        | 1.094   | 3.023   |
| 508.15 | 3.201 | 1.117      | 11.778 | 2.715 | 1.178        | 1.069   | 3.022   |
| 513.15 | 3.160 | 1.070      | 11.616 | 2.532 | 0.966        | 1.044   | 3.020   |
| 518.15 | 3.120 | 1.023      | 11.455 | 2.350 | 0.754        | 1.019   | 3.019   |
| 523.15 | 3.079 | 0.976      | 11.293 | 2.167 | 0.542        | 0.994   | 3.017   |
| 528.15 | 3.039 | 0.929      | 11.132 | 1.985 | 0.330        | 0.969   | 3.016   |
| 533.15 | 2.998 | 0.882      | 10.970 | 1.802 | 0.118        | 0.944   | 3.014   |
| 538.15 | 2.958 | 0.835      | 10.809 | 1.620 | −0.094       | 0.919   | 3.013   |



|        |       |       |        |       |        |       |       |
|--------|-------|-------|--------|-------|--------|-------|-------|
| 543.15 | 2.917 | 0.788 | 10.647 | 1.437 | −0.306 | 0.894 | 3.011 |
|--------|-------|-------|--------|-------|--------|-------|-------|

| Kiselev |                 |            |      |       |              |         |         |
|---------|-----------------|------------|------|-------|--------------|---------|---------|
| T(K)    | Dichloromethane | Chloroform | THF  | Ether | Acetonitrile | Toluene | Benzene |
| 493.15  | 4.54            | 4.25       | 0.11 | 3.81  | 3.87         | 3.13    | 0.41    |
| 498.15  | 4.71            | 4.40       | 1.01 | 4.52  | 4.30         | 3.35    | 0.44    |
| 503.15  | 4.89            | 4.56       | 1.91 | 5.24  | 4.73         | 3.57    | 0.47    |
| 508.15  | 5.06            | 4.71       | 2.81 | 5.95  | 5.16         | 3.79    | 0.50    |
| 513.15  | 5.24            | 4.87       | 3.71 | 6.67  | 5.59         | 4.01    | 0.53    |
| 518.15  | 5.41            | 5.02       | 4.61 | 7.38  | 6.02         | 4.23    | 0.56    |
| 523.15  | 5.59            | 5.18       | 5.51 | 8.10  | 6.45         | 4.45    | 0.59    |
| 528.15  | 5.76            | 5.33       | 6.41 | 8.81  | 6.88         | 4.67    | 0.62    |
| 533.15  | 5.94            | 5.49       | 7.31 | 9.53  | 7.31         | 4.89    | 0.65    |
| 538.15  | 6.11            | 5.64       | 8.21 | 10.24 | 7.74         | 5.11    | 0.68    |
| 543.15  | 6.29            | 5.80       | 9.11 | 10.96 | 8.17         | 5.33    | 0.71    |

| Spherical |                 |            |       |       |              |         |         |
|-----------|-----------------|------------|-------|-------|--------------|---------|---------|
| T(K)      | Dichloromethane | Chloroform | THF   | Ether | Acetonitrile | Toluene | Benzene |
| 493.15    | 4.93            | 4.80       | 1.47  | 1.32  | 4.51         | 2.62    | 0.43    |
| 498.15    | 5.14            | 4.99       | 2.47  | 2.06  | 4.99         | 2.85    | 0.46    |
| 503.15    | 5.34            | 5.18       | 3.48  | 2.80  | 5.48         | 3.08    | 0.49    |
| 508.15    | 5.55            | 5.37       | 4.48  | 3.54  | 5.96         | 3.31    | 0.53    |
| 513.15    | 5.75            | 5.56       | 5.49  | 4.28  | 6.45         | 3.54    | 0.56    |
| 518.15    | 5.96            | 5.75       | 6.49  | 5.02  | 6.93         | 3.77    | 0.59    |
| 523.15    | 6.16            | 5.94       | 7.50  | 5.76  | 7.42         | 4.00    | 0.63    |
| 528.15    | 6.37            | 6.13       | 8.50  | 6.50  | 7.90         | 4.23    | 0.66    |
| 533.15    | 6.57            | 6.32       | 9.51  | 7.24  | 8.39         | 4.46    | 0.69    |
| 538.15    | 6.78            | 6.51       | 10.51 | 7.98  | 8.87         | 4.69    | 0.73    |
| 543.15    | 6.98            | 6.70       | 11.52 | 8.72  | 9.36         | 4.92    | 0.76    |

| Geometric |                 |            |      |       |              |         |         |
|-----------|-----------------|------------|------|-------|--------------|---------|---------|
| T(K)      | Dichloromethane | Chloroform | THF  | Ether | Acetonitrile | Toluene | Benzene |
| 493.15    | 2.14            | 1.86       | 1.99 | 1.03  | 7.68         | 1.99    | 0.39    |
| 498.15    | 2.47            | 2.16       | 3.45 | 1.32  | 8.00         | 2.08    | 0.42    |
| 503.15    | 2.79            | 2.45       | 3.93 | 1.61  | 8.32         | 2.16    | 0.46    |
| 508.15    | 3.12            | 2.75       | 4.40 | 1.90  | 8.64         | 2.25    | 0.49    |
| 513.15    | 3.45            | 3.04       | 4.88 | 2.19  | 8.96         | 2.33    | 0.53    |
| 518.15    | 3.78            | 3.34       | 5.35 | 2.48  | 9.28         | 2.41    | 0.56    |
| 523.15    | 4.11            | 3.63       | 5.83 | 2.77  | 9.60         | 2.50    | 0.60    |
| 528.15    | 4.43            | 3.93       | 6.30 | 3.06  | 9.92         | 2.58    | 0.63    |
| 533.15    | 4.76            | 4.22       | 6.78 | 3.35  | 10.24        | 2.66    | 0.67    |

|        |      |      |      |      |       |      |      |
|--------|------|------|------|------|-------|------|------|
| 538.15 | 5.09 | 4.52 | 7.25 | 3.64 | 10.56 | 2.75 | 0.70 |
| 543.15 | 5.42 | 4.81 | 7.73 | 3.93 | 10.87 | 2.83 | 0.74 |

| VDW    |                 |            |       |       |              |         |         |
|--------|-----------------|------------|-------|-------|--------------|---------|---------|
| T(K)   | Dichloromethane | Chloroform | THF   | Ether | Acetonitrile | Toluene | Benzene |
| 493.15 | 0.86            | 1.24       | 10.40 | 12.47 | 1.27         | 0.86    | 0.63    |
| 498.15 | 1.17            | 1.52       | 11.39 | 13.02 | 1.41         | 1.10    | 0.68    |
| 503.15 | 1.47            | 1.81       | 12.39 | 13.57 | 1.55         | 1.34    | 0.73    |
| 508.15 | 1.78            | 2.09       | 13.38 | 14.12 | 1.69         | 1.58    | 0.77    |
| 513.15 | 2.08            | 2.38       | 14.38 | 14.67 | 1.83         | 1.82    | 0.82    |
| 518.15 | 2.39            | 2.66       | 15.38 | 15.22 | 1.98         | 2.06    | 0.87    |
| 523.15 | 2.69            | 2.95       | 16.37 | 15.77 | 2.12         | 2.30    | 0.91    |
| 528.15 | 3.00            | 3.23       | 17.37 | 16.32 | 2.26         | 2.54    | 0.96    |
| 533.15 | 3.30            | 3.52       | 18.36 | 16.87 | 2.40         | 2.78    | 1.01    |
| 538.15 | 3.61            | 3.80       | 19.36 | 17.42 | 2.54         | 3.02    | 1.05    |
| 543.15 | 3.91            | 4.09       | 20.36 | 17.97 | 2.68         | 3.26    | 1.10    |

| Redlich-Kwong |                 |            |       |       |              |         |         |
|---------------|-----------------|------------|-------|-------|--------------|---------|---------|
| T(K)          | Dichloromethane | Chloroform | THF   | Ether | Acetonitrile | Toluene | Benzene |
| 493.15        | 0.30            | 1.66       | 1.39  | 1.64  | 1.83         | 1.08    | 0.22    |
| 498.15        | 0.41            | 1.77       | 2.32  | 2.18  | 1.98         | 1.34    | 0.27    |
| 503.15        | 0.52            | 1.87       | 3.24  | 2.73  | 2.14         | 1.60    | 0.32    |
| 508.15        | 0.63            | 1.98       | 4.17  | 3.27  | 2.30         | 1.86    | 0.38    |
| 513.15        | 0.74            | 2.08       | 5.09  | 3.82  | 2.45         | 2.12    | 0.43    |
| 518.15        | 0.85            | 2.19       | 6.02  | 4.36  | 2.61         | 2.38    | 0.48    |
| 523.15        | 0.96            | 2.29       | 6.94  | 4.91  | 2.76         | 2.64    | 0.53    |
| 528.15        | 1.07            | 2.40       | 7.87  | 5.45  | 2.92         | 2.90    | 0.59    |
| 533.15        | 1.18            | 2.50       | 8.79  | 6.00  | 3.08         | 3.16    | 0.64    |
| 538.15        | 1.29            | 2.61       | 9.72  | 6.54  | 3.23         | 3.42    | 0.69    |
| 543.15        | 1.40            | 2.71       | 10.64 | 7.09  | 3.39         | 3.68    | 0.75    |

| Cylindrical |                 |            |       |       |              |         |         |
|-------------|-----------------|------------|-------|-------|--------------|---------|---------|
| T(K)        | Dichloromethane | Chloroform | THF   | Ether | Acetonitrile | Toluene | Benzene |
| 493.15      | 0.97            | 0.85       | 7.63  | 4.61  | 1.05         | 2.29    | 0.91    |
| 498.15      | 1.10            | 0.97       | 8.59  | 5.14  | 1.48         | 2.61    | 0.94    |
| 503.15      | 1.23            | 1.09       | 9.54  | 5.67  | 1.91         | 2.92    | 0.98    |
| 508.15      | 1.36            | 1.21       | 10.50 | 6.20  | 2.34         | 3.24    | 1.01    |
| 513.15      | 1.49            | 1.33       | 11.45 | 6.73  | 2.77         | 3.55    | 1.04    |
| 518.15      | 1.62            | 1.45       | 12.41 | 7.26  | 3.20         | 3.87    | 1.07    |
| 523.15      | 1.75            | 1.57       | 13.36 | 7.79  | 3.63         | 4.18    | 1.10    |
| 528.15      | 1.88            | 1.69       | 14.32 | 8.32  | 4.06         | 4.50    | 1.14    |

|        |      |      |       |      |      |      |      |
|--------|------|------|-------|------|------|------|------|
| 533.15 | 2.01 | 1.81 | 15.27 | 8.85 | 4.49 | 4.81 | 1.17 |
| 538.15 | 2.14 | 1.93 | 16.23 | 9.38 | 4.92 | 5.13 | 1.20 |
| 543.15 | 2.27 | 2.05 | 17.18 | 9.91 | 5.35 | 5.44 | 1.23 |

#### Hamieh model

| T(K)   | Dichloromethane | Chloroform | THF   | Ether | Acetonitrile | Toluene | Benzene |
|--------|-----------------|------------|-------|-------|--------------|---------|---------|
| 493.15 | 6.96            | 4.59       | 34.97 | 7.81  | 11.31        | 8.27    | 2.19    |
| 498.15 | 7.17            | 4.78       | 35.78 | 8.15  | 11.60        | 8.41    | 2.24    |
| 503.15 | 7.39            | 4.96       | 36.58 | 8.48  | 11.88        | 8.56    | 2.29    |
| 508.15 | 7.60            | 5.15       | 37.39 | 8.82  | 12.16        | 8.70    | 2.34    |
| 513.15 | 7.82            | 5.33       | 38.20 | 9.15  | 12.44        | 8.84    | 2.39    |
| 518.15 | 8.03            | 5.52       | 39.01 | 9.49  | 12.72        | 8.99    | 2.44    |
| 523.15 | 8.25            | 5.70       | 39.81 | 9.82  | 13.00        | 9.13    | 2.49    |
| 528.15 | 8.46            | 5.89       | 40.62 | 10.16 | 13.28        | 9.27    | 2.54    |
| 533.15 | 8.68            | 6.07       | 41.43 | 10.49 | 13.57        | 9.41    | 2.59    |
| 538.15 | 8.89            | 6.26       | 42.24 | 10.83 | 13.85        | 9.56    | 2.64    |
| 543.15 | 9.11            | 6.44       | 43.04 | 11.16 | 14.13        | 9.70    | 2.69    |

#### Topological index

| T(K)   | Dichloromethane | Chloroform | THF   | Ether | Acetonitrile | Toluene | Benzene |
|--------|-----------------|------------|-------|-------|--------------|---------|---------|
| 493.15 | 3.32            | 3.33       | 1.61  | 1.18  | 1.54         | 1.65    | 0.15    |
| 498.15 | 3.45            | 3.45       | 2.58  | 1.98  | 2.08         | 1.88    | 0.18    |
| 503.15 | 3.59            | 3.58       | 3.56  | 2.79  | 2.61         | 2.11    | 0.21    |
| 508.15 | 3.72            | 3.70       | 4.53  | 3.59  | 3.15         | 2.34    | 0.24    |
| 513.15 | 3.86            | 3.83       | 5.51  | 4.40  | 3.68         | 2.57    | 0.27    |
| 518.15 | 3.99            | 3.95       | 6.48  | 5.20  | 4.22         | 2.80    | 0.30    |
| 523.15 | 4.13            | 4.08       | 7.46  | 6.01  | 4.75         | 3.03    | 0.33    |
| 528.15 | 4.26            | 4.20       | 8.43  | 6.81  | 5.29         | 3.26    | 0.36    |
| 533.15 | 4.40            | 4.33       | 9.41  | 7.62  | 5.82         | 3.49    | 0.39    |
| 538.15 | 4.53            | 4.45       | 10.38 | 8.42  | 6.36         | 3.72    | 0.42    |
| 543.15 | 4.67            | 4.58       | 11.36 | 9.23  | 6.89         | 3.95    | 0.45    |

#### Deformation polarizability

| T(K)   | Dichloromethane | Chloroform | THF      | Ether   | Acetonitrile | Toluene  | Benzene |
|--------|-----------------|------------|----------|---------|--------------|----------|---------|
| 493.15 | 10.88055        | 7.175335   | 55.64225 | 42.1912 | 23.3348      | 6.354125 | 2.8137  |
| 498.15 | 10.86555        | 7.129835   | 55.21725 | 41.8312 | 23.0948      | 6.241625 | 2.40518 |
| 503.15 | 10.85055        | 7.084335   | 54.79225 | 41.4712 | 22.8548      | 6.129125 | 2.39118 |
| 508.15 | 10.83555        | 7.038835   | 54.36725 | 41.1112 | 22.6148      | 6.016625 | 2.37718 |
| 513.15 | 10.82055        | 6.993335   | 53.94225 | 40.7512 | 22.3748      | 5.904125 | 2.36318 |
| 518.15 | 10.80555        | 6.947835   | 53.51725 | 40.3912 | 22.1348      | 5.791625 | 2.34918 |
| 523.15 | 10.79055        | 6.902335   | 53.09225 | 40.0312 | 21.8948      | 5.679125 | 2.33518 |

|        |          |          |          |         |         |          |         |
|--------|----------|----------|----------|---------|---------|----------|---------|
| 528.15 | 10.77555 | 6.856835 | 52.66725 | 39.6712 | 21.6548 | 5.566625 | 2.32118 |
| 533.15 | 10.76055 | 6.811335 | 52.24225 | 39.3112 | 21.4148 | 5.454125 | 2.30718 |
| 538.15 | 10.74555 | 6.765835 | 51.81725 | 38.9512 | 21.1748 | 5.341625 | 2.29318 |
| 543.15 | 10.73055 | 6.720335 | 51.39225 | 38.5912 | 20.9348 | 5.229125 | 2.27918 |

### Vapor pressure

| T(K)   | Dichloromethane | Chloroform | THF     | Ether    | Acetonitrile | Toluene | Benzene |
|--------|-----------------|------------|---------|----------|--------------|---------|---------|
| 493.15 | 6.60275         | 5.08905    | 63.7285 | 55.10965 | 43.42375     | 11.637  | 1.50685 |
| 498.15 | 6.52775         | 5.02405    | 63.2785 | 54.66465 | 43.04875     | 11.537  | 1.50185 |
| 503.15 | 6.45275         | 4.95905    | 62.8285 | 54.21965 | 42.67375     | 11.437  | 1.49685 |
| 508.15 | 6.37775         | 4.89405    | 62.3785 | 53.77465 | 42.29875     | 11.337  | 1.49185 |
| 513.15 | 6.30275         | 4.82905    | 61.9285 | 53.32965 | 41.92375     | 11.237  | 1.48685 |
| 518.15 | 6.22775         | 4.76405    | 61.4785 | 52.88465 | 41.54875     | 11.137  | 1.48185 |
| 523.15 | 6.15275         | 4.69905    | 61.0285 | 52.43965 | 41.17375     | 11.037  | 1.47685 |
| 528.15 | 6.07775         | 4.63405    | 60.5785 | 51.99465 | 40.79875     | 10.937  | 1.47185 |
| 533.15 | 6.00275         | 4.56905    | 60.1285 | 51.54965 | 40.42375     | 10.837  | 1.46685 |
| 538.15 | 5.92775         | 4.50405    | 59.6785 | 51.10465 | 40.04875     | 10.737  | 1.46185 |
| 543.15 | 5.85275         | 4.43905    | 59.2285 | 50.65965 | 39.67375     | 10.637  | 1.45685 |

**Table S8.** Values (in kJ/mol) of the specific free energy ( $-\Delta G_a^{sp}(T)$ ) of the various polar solvents adsorbed on UiO-66(NH<sub>2</sub>) material surface for different temperatures by using the various IGC models and methods.

| Kiselev   |                 |            |         |         |
|-----------|-----------------|------------|---------|---------|
| T (K)     | Dichloromethane | Chloroform | Toluene | Benzene |
| 493.15    | 0.010           | 3.831      | 1.889   | −0.268  |
| 498.15    | −0.107          | 3.662      | 1.642   | −0.284  |
| 503.15    | −0.223          | 3.494      | 1.394   | −0.300  |
| 508.15    | −0.340          | 3.325      | 1.147   | −0.316  |
| 513.15    | −0.456          | 3.157      | 0.899   | −0.332  |
| 518.15    | −0.573          | 2.988      | 0.652   | −0.348  |
| 523.15    | −0.689          | 2.820      | 0.404   | −0.364  |
| 528.15    | −0.806          | 2.651      | 0.157   | −0.380  |
| 533.15    | −0.922          | 2.483      | −0.091  | −0.396  |
| 538.15    | −1.039          | 2.314      | −0.338  | −0.412  |
| 543.15    | −1.155          | 2.146      | −0.586  | −0.428  |
| Spherical |                 |            |         |         |
| T (K)     | Dichloromethane | Chloroform | Toluene | Benzene |
| 493.15    | 5.137           | 10.533     | −4.630  | 0.221   |
| 498.15    | 5.037           | 11.329     | −4.960  | 0.206   |
| 503.15    | 4.937           | 11.593     | −5.290  | 0.191   |
| 508.15    | 4.837           | 11.513     | −5.620  | 0.176   |
| 513.15    | 4.737           | 11.262     | −5.950  | 0.161   |
| 518.15    | 4.637           | 9.947      | −6.280  | 0.146   |
| 523.15    | 4.537           | 6.512      | −6.610  | 0.131   |
| 528.15    | 4.437           | 7.512      | −6.940  | 0.116   |
| 533.15    | 4.337           | 8.512      | −7.270  | 0.101   |
| 538.15    | 4.237           | 9.512      | −7.600  | 0.086   |

| 543.15        | 4.137           | 10.512     | −7.930  | 0.071   |
|---------------|-----------------|------------|---------|---------|
| Geometric     |                 |            |         |         |
| T (K)         | Dichloromethane | Chloroform | Toluene | Benzene |
| 493.15        | −3.412          | 10.750     | 22.663  | 0.634   |
| 498.15        | −3.622          | 10.715     | 25.070  | 0.609   |
| 503.15        | −3.832          | 10.680     | 27.045  | 0.584   |
| 508.15        | −4.042          | 10.645     | 28.848  | 0.559   |
| 513.15        | −4.252          | 10.610     | 30.583  | 0.534   |
| 518.15        | −4.462          | 10.575     | 31.660  | 0.509   |
| 523.15        | −4.672          | 10.540     | 32.282  | 0.484   |
| 528.15        | −4.882          | 10.505     | 33.282  | 0.459   |
| 533.15        | −5.092          | 10.470     | 34.282  | 0.434   |
| 538.15        | −5.302          | 10.435     | 35.282  | 0.409   |
| 543.15        | −5.512          | 10.400     | 36.282  | 0.384   |
| VDW           |                 |            |         |         |
| T (K)         | Dichloromethane | Chloroform | Toluene | Benzene |
| 493.15        | 15.554          | 10.937     | 16.137  | 1.821   |
| 498.15        | 15.541          | 11.957     | 16.001  | 1.818   |
| 503.15        | 15.528          | 12.457     | 15.864  | 1.814   |
| 508.15        | 15.515          | 12.632     | 15.728  | 1.811   |
| 513.15        | 15.502          | 12.668     | 15.591  | 1.807   |
| 518.15        | 15.489          | 11.704     | 15.455  | 1.804   |
| 523.15        | 15.476          | 8.828      | 15.318  | 1.800   |
| 528.15        | 15.463          | 9.828      | 15.182  | 1.797   |
| 533.15        | 15.450          | 10.828     | 15.045  | 1.793   |
| 538.15        | 15.437          | 11.828     | 14.909  | 1.790   |
| 543.15        | 15.424          | 12.828     | 14.772  | 1.786   |
| Redlich-Kwong |                 |            |         |         |
| T (K)         | Dichloromethane | Chloroform | Toluene | Benzene |
| 493.15        | 4.245           | 8.109      | 12.480  | 2.157   |
| 498.15        | 4.120           | 7.994      | 12.290  | 2.152   |
| 503.15        | 3.995           | 7.878      | 12.100  | 2.147   |
| 508.15        | 3.870           | 7.763      | 11.910  | 2.142   |
| 513.15        | 3.745           | 7.647      | 11.720  | 2.137   |
| 518.15        | 3.620           | 7.532      | 11.530  | 2.132   |
| 523.15        | 3.495           | 7.416      | 11.340  | 2.127   |
| 528.15        | 3.370           | 7.301      | 11.150  | 2.122   |
| 533.15        | 3.245           | 7.185      | 10.960  | 2.117   |
| 538.15        | 3.120           | 7.070      | 10.770  | 2.112   |
| 543.15        | 2.995           | 6.954      | 10.580  | 2.107   |
| Cylindrical   |                 |            |         |         |
| T (K)         | Dichloromethane | Chloroform | Toluene | Benzene |
| 493.15        | 9.975           | 9.654      | 5.986   | 0.314   |
| 498.15        | 9.876           | 9.544      | 5.826   | 0.312   |
| 503.15        | 9.778           | 9.434      | 5.666   | 0.309   |
| 508.15        | 9.679           | 9.324      | 5.506   | 0.307   |
| 513.15        | 9.581           | 9.214      | 5.346   | 0.304   |
| 518.15        | 9.482           | 9.104      | 5.186   | 0.302   |
| 523.15        | 9.384           | 8.994      | 5.026   | 0.299   |
| 528.15        | 9.285           | 8.884      | 4.866   | 0.297   |
| 533.15        | 9.187           | 8.774      | 4.706   | 0.294   |

|                                   |                        |                   |                |                |
|-----------------------------------|------------------------|-------------------|----------------|----------------|
| 538.15                            | 9.088                  | 8.664             | 4.546          | 0.292          |
| 543.15                            | 8.990                  | 8.554             | 4.386          | 0.289          |
| <b>Hamieh model</b>               |                        |                   |                |                |
| <b>T (K)</b>                      | <b>Dichloromethane</b> | <b>Chloroform</b> | <b>Toluene</b> | <b>Benzene</b> |
| 493.15                            | 3.541                  | 7.722             | 10.278         | 0.760          |
| 498.15                            | 3.511                  | 7.691             | 10.185         | 0.753          |
| 503.15                            | 3.481                  | 7.660             | 10.091         | 0.746          |
| 508.15                            | 3.451                  | 7.629             | 9.998          | 0.739          |
| 513.15                            | 3.421                  | 7.598             | 9.904          | 0.732          |
| 518.15                            | 3.391                  | 7.567             | 9.811          | 0.725          |
| 523.15                            | 3.361                  | 7.536             | 9.717          | 0.718          |
| 528.15                            | 3.331                  | 7.505             | 9.624          | 0.711          |
| 533.15                            | 3.301                  | 7.474             | 9.530          | 0.704          |
| 538.15                            | 3.271                  | 7.443             | 9.437          | 0.697          |
| 543.15                            | 3.241                  | 7.412             | 9.343          | 0.690          |
| <b>Topological index</b>          |                        |                   |                |                |
| <b>T (K)</b>                      | <b>Dichloromethane</b> | <b>Chloroform</b> | <b>Toluene</b> | <b>Benzene</b> |
| 493.15                            | 18.234                 | 15.884            | 3.606          | 3.751          |
| 498.15                            | 18.110                 | 15.783            | 3.441          | 3.780          |
| 503.15                            | 17.986                 | 15.683            | 3.276          | 3.810          |
| 508.15                            | 17.862                 | 15.582            | 3.111          | 3.839          |
| 513.15                            | 17.738                 | 15.482            | 2.946          | 3.869          |
| 518.15                            | 17.614                 | 15.381            | 2.781          | 3.898          |
| 523.15                            | 17.490                 | 15.281            | 2.616          | 3.928          |
| 528.15                            | 17.366                 | 15.180            | 2.451          | 3.957          |
| 533.15                            | 17.242                 | 15.080            | 2.286          | 3.987          |
| 538.15                            | 17.118                 | 14.979            | 2.121          | 4.016          |
| 543.15                            | 16.994                 | 14.879            | 1.956          | 4.046          |
| <b>Deformation polarizability</b> |                        |                   |                |                |
| <b>T (K)</b>                      | <b>Dichloromethane</b> | <b>Chloroform</b> | <b>Toluene</b> | <b>Benzene</b> |
| 493.15                            | 4.923                  | 10.264            | 7.179          | 0.508          |
| 498.15                            | 4.940                  | 10.230            | 7.085          | 0.502          |
| 503.15                            | 4.956                  | 10.197            | 6.990          | 0.496          |
| 508.15                            | 4.973                  | 10.163            | 6.896          | 0.490          |
| 513.15                            | 4.989                  | 10.130            | 6.801          | 0.484          |
| 518.15                            | 5.006                  | 10.096            | 6.707          | 0.478          |
| 523.15                            | 5.022                  | 10.063            | 6.612          | 0.472          |
| 528.15                            | 5.039                  | 10.029            | 6.518          | 0.466          |
| 533.15                            | 5.055                  | 9.996             | 6.423          | 0.460          |
| 538.15                            | 5.072                  | 9.962             | 6.329          | 0.454          |
| 543.15                            | 5.088                  | 9.929             | 6.234          | 0.448          |
| <b>Vapor pressure</b>             |                        |                   |                |                |
| <b>T (K)</b>                      | <b>Dichloromethane</b> | <b>Chloroform</b> | <b>Toluene</b> | <b>Benzene</b> |
| 493.15                            | 10.312                 | 6.465             | 5.629          | 0.057          |
| 498.15                            | 10.287                 | 6.456             | 5.557          | 0.052          |
| 503.15                            | 10.264                 | 6.447             | 5.484          | 0.047          |
| 508.15                            | 10.255                 | 6.442             | 5.412          | 0.042          |
| 513.15                            | 10.254                 | 6.439             | 5.339          | 0.037          |
| 518.15                            | 10.270                 | 6.455             | 5.267          | 0.032          |
| 523.15                            | 10.271                 | 6.462             | 5.194          | 0.027          |
| 528.15                            | 10.325                 | 6.490             | 5.122          | 0.022          |

|               |        |       |       |       |
|---------------|--------|-------|-------|-------|
| <b>533.15</b> | 10.351 | 6.577 | 5.049 | 0.017 |
| <b>538.15</b> | 10.389 | 6.537 | 4.977 | 0.012 |
| <b>543.15</b> | 10.484 | 6.607 | 4.904 | 0.007 |

**Table S9.** Values of the specific enthalpy ( $-\Delta H_a^{sp}$  in  $\text{kJ mol}^{-1}$ ) of the various polar solvents adsorbed on UiO-66-00 by using the various molecular models, Hamieh model, topological index, deformation polarizability and vapor pressure methods compared to global average.

| Probes                     | DCM   | Chloroform | THF   | Ether | Acetonitrile | Toluene | Benzene |
|----------------------------|-------|------------|-------|-------|--------------|---------|---------|
| Kiselev                    | 12.35 | 11.66      | 52.33 | 47.80 | 39.15        | 8.54    | 1.80    |
| Spherical                  | 26.15 | 13.08      | 53.70 | 53.09 | 45.34        | 4.00    | 1.00    |
| Geometric                  | 30.21 | 27.23      | 43.87 | 27.57 | 23.78        | 6.24    | 0.30    |
| VDW                        | 24.35 | 16.17      | 92.23 | 33.84 | 21.61        | 27.65   | 3.30    |
| Redlich-Kwong              | 24.44 | 16.25      | 67.90 | 55.00 | 21.63        | 15.20   | 2.40    |
| Cylindrical                | 10.23 | 9.82       | 44.23 | 43.21 | 39.15        | 6.88    | 0.75    |
| Hamieh model               | 14.25 | 13.65      | 44.67 | 25.23 | 16.45        | 5.80    | 2.74    |
| Topological index          | 10.00 | 8.08       | 35.65 | 7.39  | 40.52        | 8.67    | 1.26    |
| Deformation polarizability | 5.23  | 3.37       | 38.50 | 10.00 | 42.60        | 8.61    | 1.92    |
| Vapor pressure             | 4.80  | 3.10       | 30.97 | 31.64 | 29.48        | 7.02    | 1.06    |
| Average values             | 18.23 | 16.22      | 44.96 | 32.10 | 31.97        | 9.86    | 1.65    |

**Table S10.** Values of the specific entropy ( $-\Delta S_a^{sp}$  in  $\text{J K}^{-1}\text{mol}^{-1}$ ) of the various polar solvents adsorbed on UiO-66-00 by using the various molecular models, Hamieh model, topological index, deformation polarizability and vapor pressure methods compared to global average.

| Probes                     | DCM   | Chloroform | THF   | Ether | Acetonitrile | Toluene | Benzene |
|----------------------------|-------|------------|-------|-------|--------------|---------|---------|
| Kiselev                    | 27.8  | 26.5       | 162.0 | 98.0  | 95.0         | 31.0    | 8.0     |
| Spherical                  | 115.7 | 74.2       | 155.0 | 120.0 | 100.0        | 14.0    | 4.0     |
| Geometric                  | 65.6  | 59.0       | 95.0  | 58.0  | 63.8         | 16.7    | 1.8     |
| VDW                        | 87.3  | 84.6       | 200.0 | 120.0 | 48.2         | 66.5    | 7.1     |
| Redlich-Kwong              | 60.0  | 45.0       | 210.0 | 115.0 | 72.0         | 37.0    | 13.0    |
| Cylindrical                | 23.6  | 22.7       | 138.7 | 92.0  | 88.0         | 27.0    | 7.3     |
| Hamieh model               | 43.0  | 37.0       | 161.5 | 67.0  | 56.3         | 28.5    | 10.7    |
| Topological index          | 1.5   | 3.3        | 40.0  | 7.0   | 40.5         | 15.0    | 2.0     |
| Deformation polarizability | 3.5   | 2.8        | 31.0  | 15.0  | 42.5         | 15.0    | 0.0     |
| Vapor pressure             | 4.0   | 2.0        | 22.0  | 22.1  | 18.3         | 4.9     | 0.2     |
| Average values             | 27.8  | 26.5       | 162.0 | 98.0  | 95.0         | 31.0    | 8.0     |

**Table S11.** Values of the specific enthalpy ( $-\Delta H_a^{sp}$  in  $\text{kJ mol}^{-1}$ ) of the various polar solvents adsorbed on UiO-66-AA by using the various molecular models, Hamieh model, topological index, deformation polarizability and vapor pressure methods compared to global average.

| Probes                     | DCM    | Chloroform | THF    | Ether  | Acetonitrile | Toluene | Benzene |
|----------------------------|--------|------------|--------|--------|--------------|---------|---------|
| Kiselev                    | 18.395 | 17.889     | 57.460 | 27.537 | 14.866       | 9.905   | 3.500   |
| Spherical                  | 11.698 | 9.831      | 35.462 | 35.462 | 47.097       | 5.003   | 4.512   |
| Geometric                  | 13.331 | 2.736      | 39.241 | 29.071 | 36.339       | 1.311   | 1.980   |
| VDW                        | 10.158 | 30.327     | 34.814 | 22.105 | 30.363       | 3.383   | 2.346   |
| Redlich-Kwong              | 10.084 | 30.240     | 44.450 | 22.101 | 30.395       | 3.379   | 2.346   |
| Cylindrical                | 14.708 | 21.070     | 54.630 | 18.580 | 37.971       | 7.919   | 3.120   |
| Hamieh model               | 15.724 | 12.062     | 48.334 | 47.263 | 39.197       | 7.600   | 1.120   |
| Topological index          | 16.072 | 13.155     | 21.753 | 33.863 | 40.644       | 6.600   | 2.395   |
| Deformation polarizability | 5.539  | 7.727      | 24.018 | 45.741 | 49.862       | 6.200   | 2.395   |

|                |        |        |        |        |        |       |       |
|----------------|--------|--------|--------|--------|--------|-------|-------|
| Vapor pressure | 7.317  | 5.893  | 21.262 | 28.191 | 22.724 | 3.609 | 3.174 |
| Average values | 12.303 | 15.093 | 38.142 | 30.991 | 34.946 | 5.491 | 2.689 |

**Table S12.** Values of the specific entropy ( $-\Delta S_a^{sp}$  in  $J K^{-1} mol^{-1}$ ) of the various polar solvents adsorbed on UiO-66-AA by using the various molecular models, Hamieh model, topological index, deformation polarizability and vapor pressure methods compared to global average.

| Probes                     | DCM   | Chloroform | THF   | Ether | Acetonitrile | Toluene | Benzene |
|----------------------------|-------|------------|-------|-------|--------------|---------|---------|
| Kiselev                    | 23    | 22.6       | 64.33 | 32.8  | 30.3         | 20      | 2.1     |
| Spherical                  | 10.6  | 9          | 49.8  | 49.8  | 93.2         | 11.5    | 11.2    |
| Geometric                  | 12.1  | 18.5       | 63    | 35.2  | 68.1         | 3.4     | 3.2     |
| VDW                        | 7.2   | 63.6       | 47.5  | 37.4  | 56.5         | 6.8     | 6.3     |
| Redlich-Kwong              | 6.9   | 63         | 89.3  | 37.3  | 56.6         | 6.8     | 6.3     |
| Cylindrical                | 14.2  | 33.1       | 75.3  | 29.7  | 72.3         | 13.9    | 3.5     |
| Hamieh model               | 21.8  | 20.3       | 44.8  | 47.1  | 6.5          | 12.1    | 0.5     |
| Topological index          | 11.9  | 7          | 37.6  | 39.9  | 68.4         | 2.1     | 1.2     |
| Deformation polarizability | 2.1   | 1.1        | 40.9  | 60.8  | 84.9         | 5.6     | 4.2     |
| Vapor pressure             | 8.1   | 9.4        | 36.5  | 32.3  | 42.4         | 5       | 0.3     |
| Average values             | 11.79 | 24.76      | 54.9  | 40.23 | 57.92        | 8.72    | 3.88    |

**Table S13.** Values of the specific enthalpy ( $-\Delta H_a^{sp}$  in  $kJ mol^{-1}$ ) of the various polar solvents adsorbed on UiO-66-FA by using the various molecular models, Hamieh model, topological index, deformation polarizability and vapor pressure methods compared to global average.

| Probes                     | DCM   | Chloroform | THF   | Ether | Acetonitrile | Toluene | Benzene |
|----------------------------|-------|------------|-------|-------|--------------|---------|---------|
| Kiselev                    | 12.35 | 11.66      | 52.33 | 47.80 | 39.15        | 8.54    | 1.80    |
| Spherical                  | 26.15 | 13.08      | 53.70 | 53.09 | 45.34        | 4.00    | 1.00    |
| Geometric                  | 30.21 | 27.23      | 43.87 | 27.57 | 23.78        | 6.24    | 0.30    |
| VDW                        | 24.35 | 16.17      | 92.23 | 33.84 | 21.61        | 27.65   | 3.30    |
| Redlich-Kwong              | 24.44 | 16.25      | 67.90 | 55.00 | 21.63        | 15.20   | 2.40    |
| Cylindrical                | 10.23 | 9.82       | 44.23 | 43.21 | 39.15        | 6.88    | 0.75    |
| Hamieh model               | 14.25 | 13.65      | 44.67 | 25.23 | 16.45        | 5.80    | 2.74    |
| Topological index          | 10.00 | 8.08       | 35.65 | 7.39  | 40.52        | 8.67    | 1.26    |
| Deformation polarizability | 5.23  | 3.37       | 38.50 | 10.00 | 42.60        | 8.61    | 1.92    |
| Vapor pressure             | 4.80  | 3.10       | 30.97 | 31.64 | 29.48        | 7.02    | 1.06    |
| Average values             | 18.23 | 16.22      | 44.96 | 32.10 | 31.97        | 9.86    | 1.65    |

**Table S14.** Values of the specific entropy ( $-\Delta S_a^{sp}$  in  $J K^{-1} mol^{-1}$ ) of the various polar solvents adsorbed on UiO-66-FA by using the various molecular models, Hamieh model, topological index, deformation polarizability and vapor pressure methods compared to global average.

| Probes                     | DCM  | Chloroform | THF   | Ether | Acetonitrile | Toluene | Benzene |
|----------------------------|------|------------|-------|-------|--------------|---------|---------|
| Kiselev                    | 35.0 | 31.0       | 180.0 | 143.0 | 88.0         | 44.0    | 6.0     |
| Spherical                  | 41.0 | 38.0       | 201.0 | 148.0 | 97.0         | 46.0    | 6.7     |
| Geometric                  | 27.0 | 22.0       | 162.0 | 127.0 | 95.0         | 31.0    | 7.0     |
| VDW                        | 61.0 | 57.0       | 199.0 | 110.0 | 28.0         | 48.0    | 9.4     |
| Redlich-Kwong              | 22.0 | 21.0       | 185.0 | 109.0 | 31.0         | 52.0    | 10.6    |
| Cylindrical                | 26.0 | 24.0       | 191.0 | 136.0 | 86.0         | 53.0    | 6.4     |
| Hamieh model               | 27.0 | 25.0       | 195.0 | 161.0 | 107.0        | 46.0    | 6.0     |
| Topological index          | 23.4 | 20.0       | 66.0  | 33.0  | 46.7         | 22.5    | 1.5     |
| Deformation polarizability | 3.0  | 9.1        | 85.0  | 72.0  | 48.0         | 22.5    | 2.8     |



|                       |      |      |       |       |      |      |     |
|-----------------------|------|------|-------|-------|------|------|-----|
| <b>Vapor pressure</b> | 15.0 | 13.0 | 90.0  | 89.0  | 75.0 | 20.0 | 1.0 |
| <b>Average values</b> | 28.0 | 26.0 | 155.4 | 112.8 | 70.2 | 38.5 | 5.7 |

**Table S15.** Values of the specific enthalpy ( $-\Delta H_a^{sp}$  in  $\text{kJ mol}^{-1}$ ) of the various polar solvents adsorbed on UiO-66( $\text{NH}_2$ ) by using the various molecular models, Hamieh model, topological index, deformation polarizability and vapor pressure methods compared to global average.

| Model or method            | DCM   | Chloroform | Toluene | Benzene |
|----------------------------|-------|------------|---------|---------|
| Kiselev                    | 20.45 | 11.50      | 1.31    | 26.30   |
| Spherical                  | 29.14 | 15.00      | 1.70    | 27.91   |
| Geometric                  | 14.20 | 17.30      | 3.10    | 32.43   |
| Van der Waals              | 19.71 | 16.84      | 2.17    | 29.60   |
| Redlich-Kwong              | 19.50 | 16.57      | 2.65    | 31.22   |
| Cylindrical                | 20.50 | 19.69      | 0.56    | 21.77   |
| Hamieh model               | 10.78 | 6.50       | 1.45    | 19.50   |
| Topological index          | 15.38 | 17.61      | 0.84    | 19.88   |
| Deformation polarizability | 10.10 | 5.01       | 1.10    | 16.50   |
| Vapor pressure             | 6.49  | 10.32      | 0.55    | 12.78   |
| Average values             | 16.63 | 13.63      | 1.54    | 23.79   |

**Table S16.** Values of the specific entropy ( $-\Delta S_a^{sp}$  in  $\text{J K}^{-1}\text{mol}^{-1}$ ) of the various polar solvents adsorbed on UiO-66( $\text{NH}_2$ ) by using the various molecular models, Hamieh model, topological index, deformation polarizability and vapor pressure methods compared to global average.

| Model or method            | DCM | Chloroform | Toluene | Benzene |
|----------------------------|-----|------------|---------|---------|
| Kiselev                    | 34  | 23         | 3       | 50      |
| Spherical                  | 52  | 20         | 3       | 66      |
| Geometric                  | 7   | 42         | 5       | 78      |
| Van der Waals              | 24  | 3          | 1       | 27      |
| Redlich-Kwong              | 23  | 25         | 1       | 38      |
| Cylindrical                | 22  | 20         | 1       | 32      |
| Hamieh model               | 6   | 6          | 1       | 19      |
| Topological index          | 0   | 0          | 0       | 0       |
| Deformation polarizability | 7   | 3          | 1       | 19      |
| Vapor pressure             | 0   | 0          | 0       | 0       |
| Average value              | 17  | 14         | 2       | 33      |

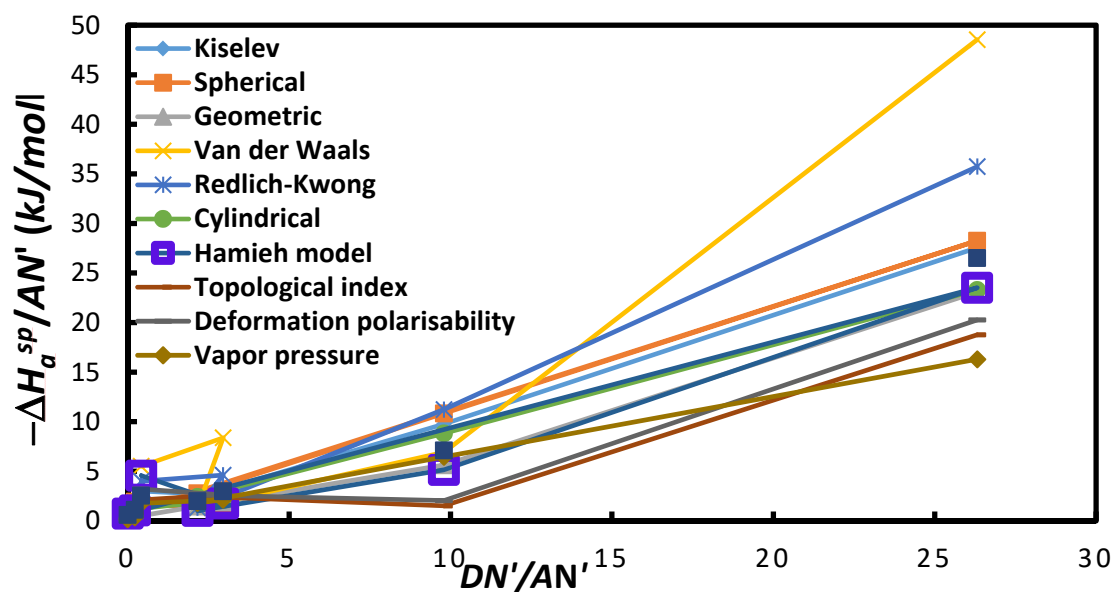

Figure S2. Variations of  $\left(\frac{-\Delta H_a^{sp}}{AN'}\right)$  as a function of  $\left(\frac{DN'}{AN'}\right)$  of UiO-66-00 for different models and IGC methods.

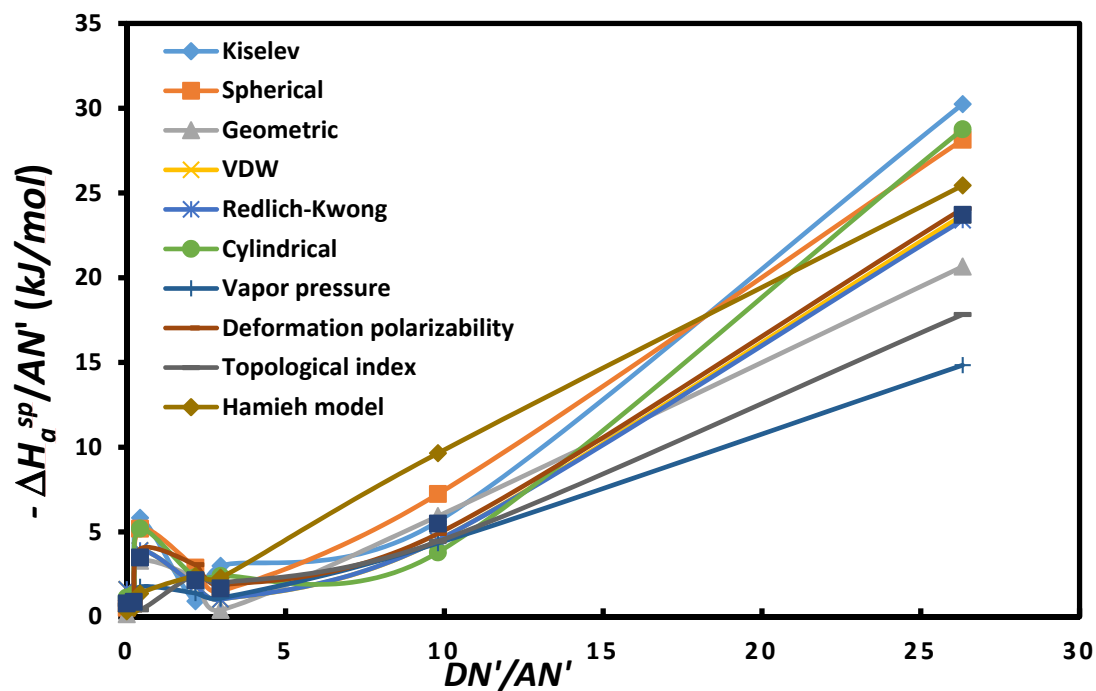

Figure S3. Variations of  $\left(\frac{-\Delta H_a^{sp}}{AN'}\right)$  as a function of  $\left(\frac{DN'}{AN'}\right)$  of UiO-66-AA for different models and IGC methods.

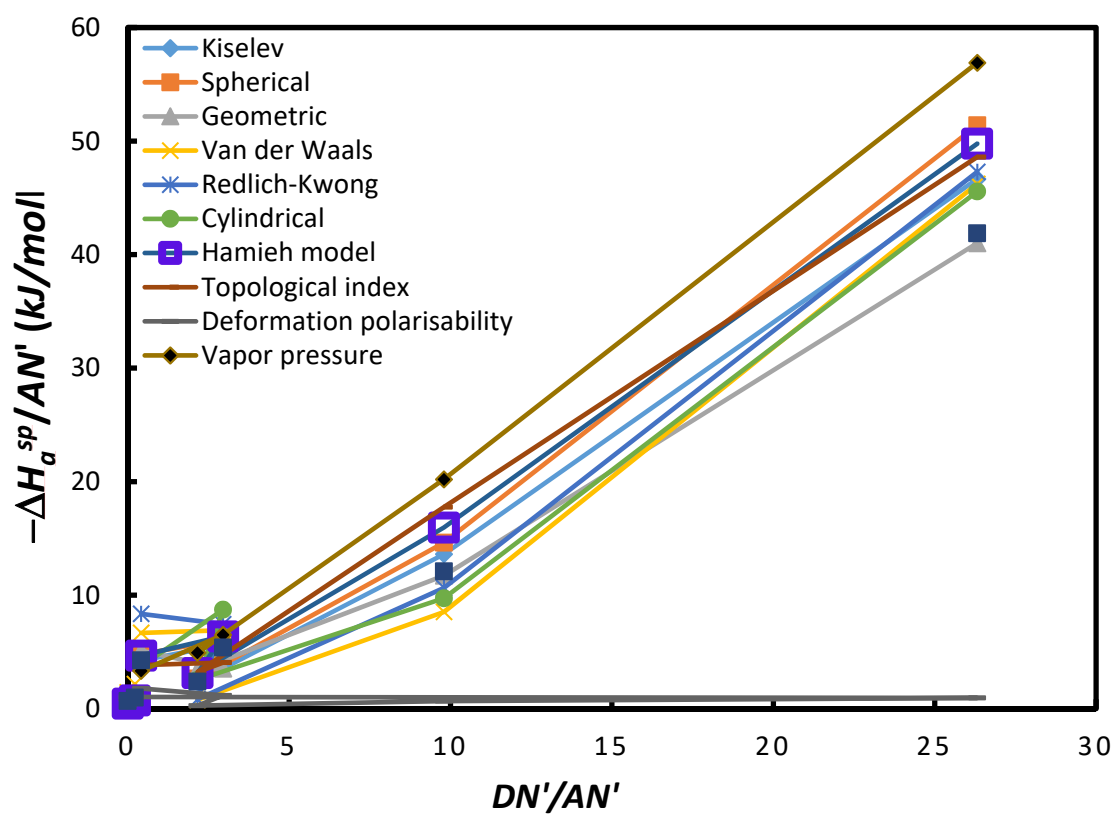

**Figure S4.** Variations of  $\left(\frac{-\Delta H_a^{sp}}{AN'}\right)$  as a function of  $\left(\frac{DN'}{AN'}\right)$  of UiO-66-FA for different models and IGC methods.

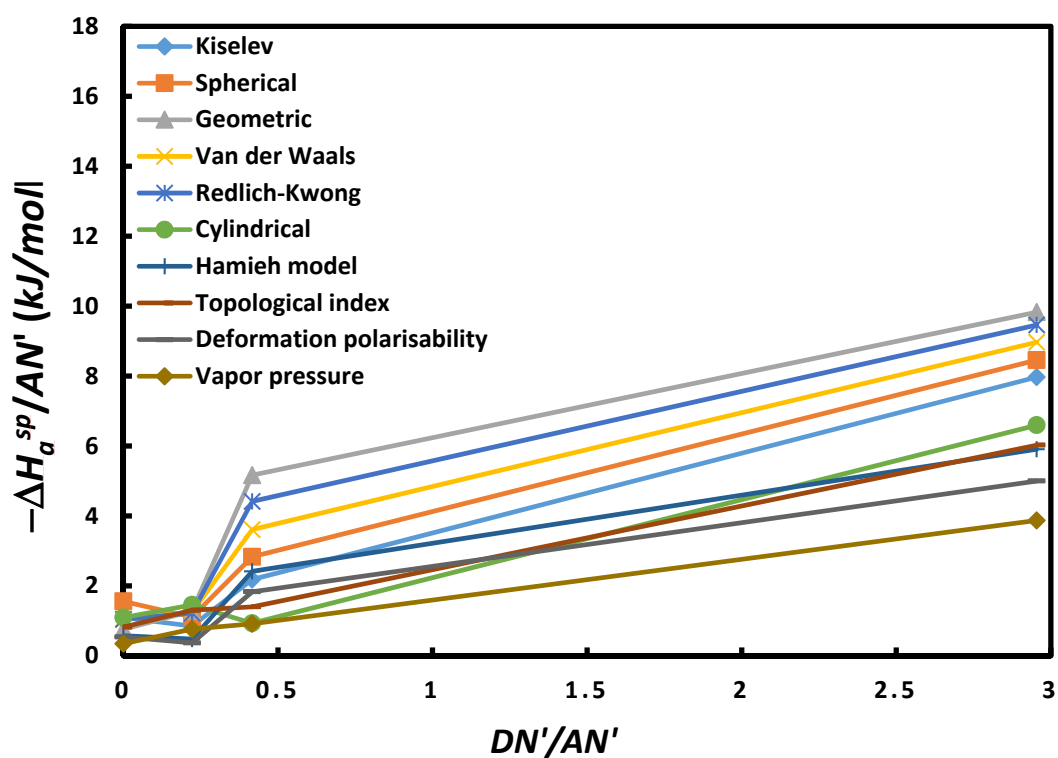

**Figure S5.** Variations of  $\left(\frac{-\Delta H_a^{sp}}{AN'}\right)$  as a function of  $\left(\frac{DN'}{AN'}\right)$  of UiO-66(NH<sub>2</sub>) for different models and IGC methods.

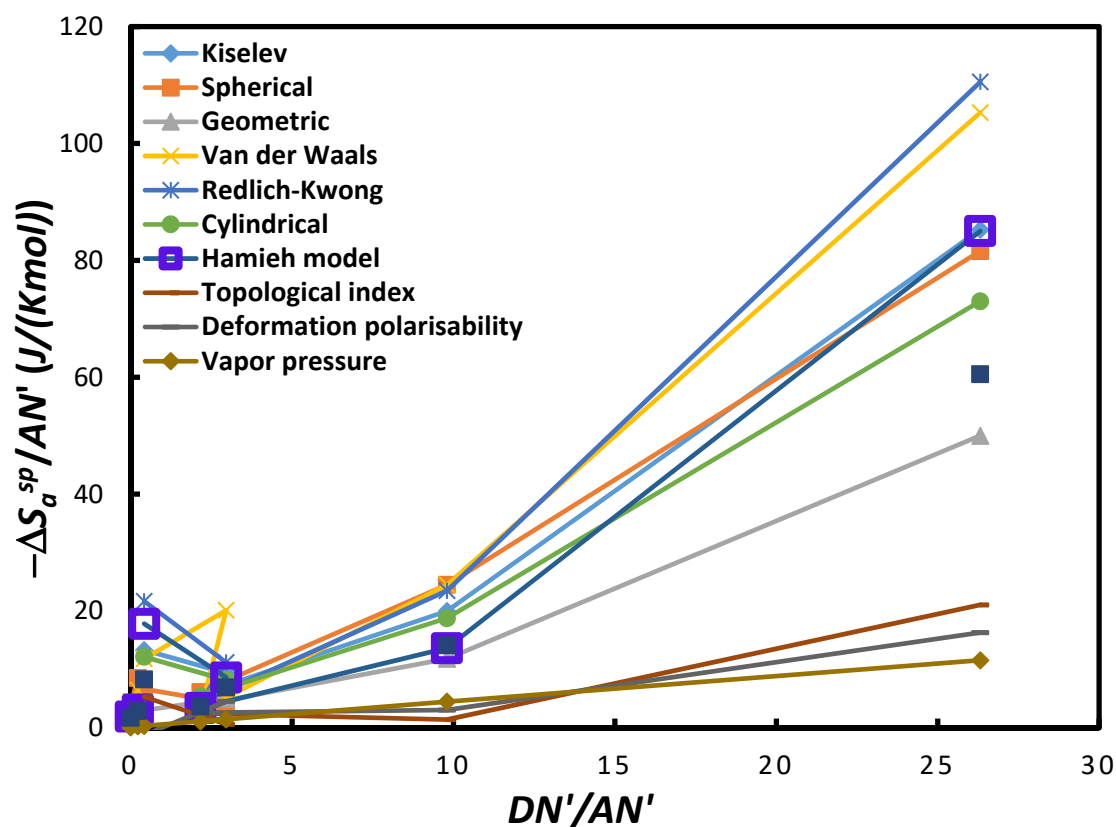

Figure S6. Variations of  $\left(\frac{-\Delta S_a^{sp}}{AN'}\right)$  as a function of  $\left(\frac{DN'}{AN'}\right)$  of UiO-66-00 for different models and IGC methods.

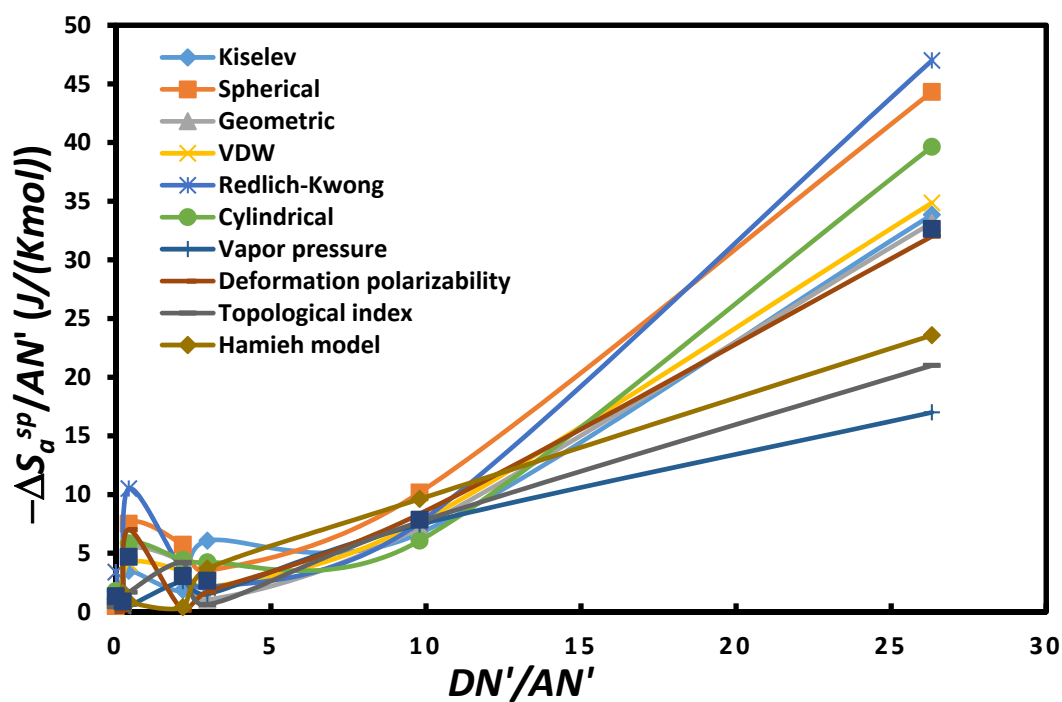

Figure S7. Variations of  $\left(\frac{-\Delta S_a^{sp}}{AN'}\right)$  as a function of  $\left(\frac{DN'}{AN'}\right)$  of UiO-66-AA for different models and IGC methods.

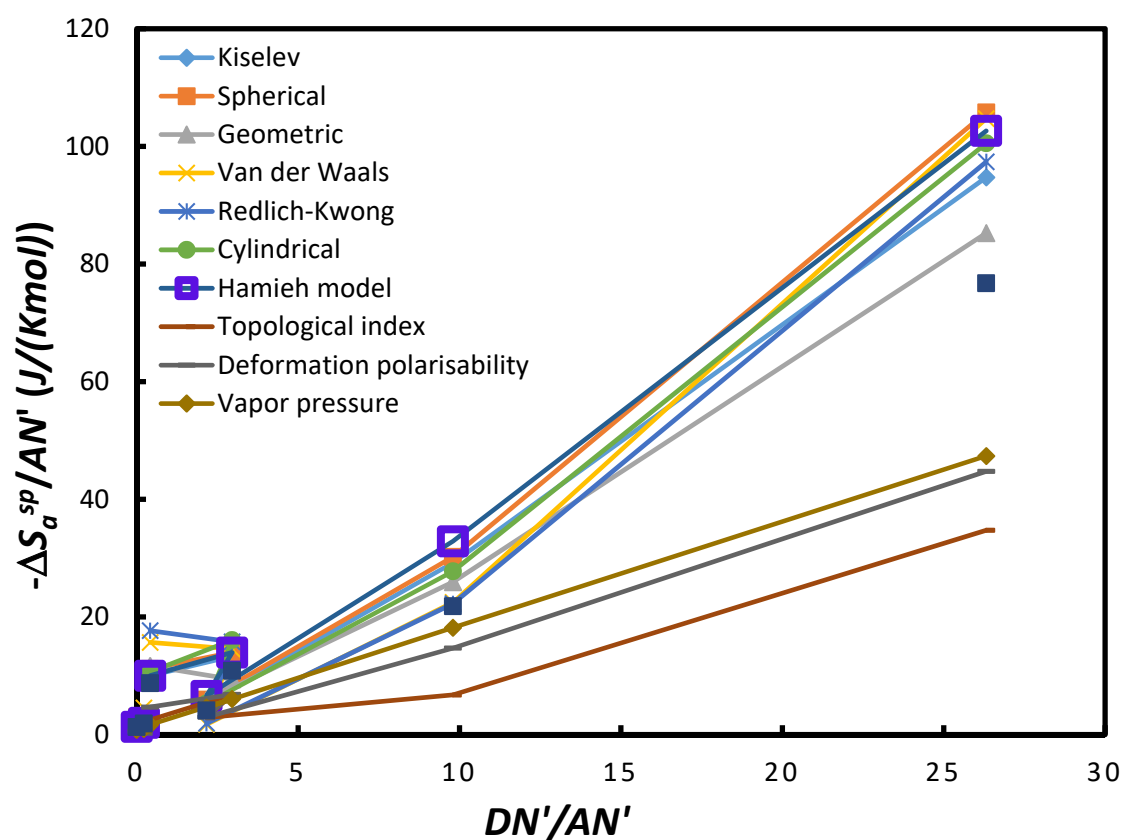

Figure S8. Variations of  $\left(\frac{-\Delta S_a^{sp}}{AN'}\right)$  as a function of  $\left(\frac{DN'}{AN'}\right)$  of UiO-66-FA for different models and IGC methods.

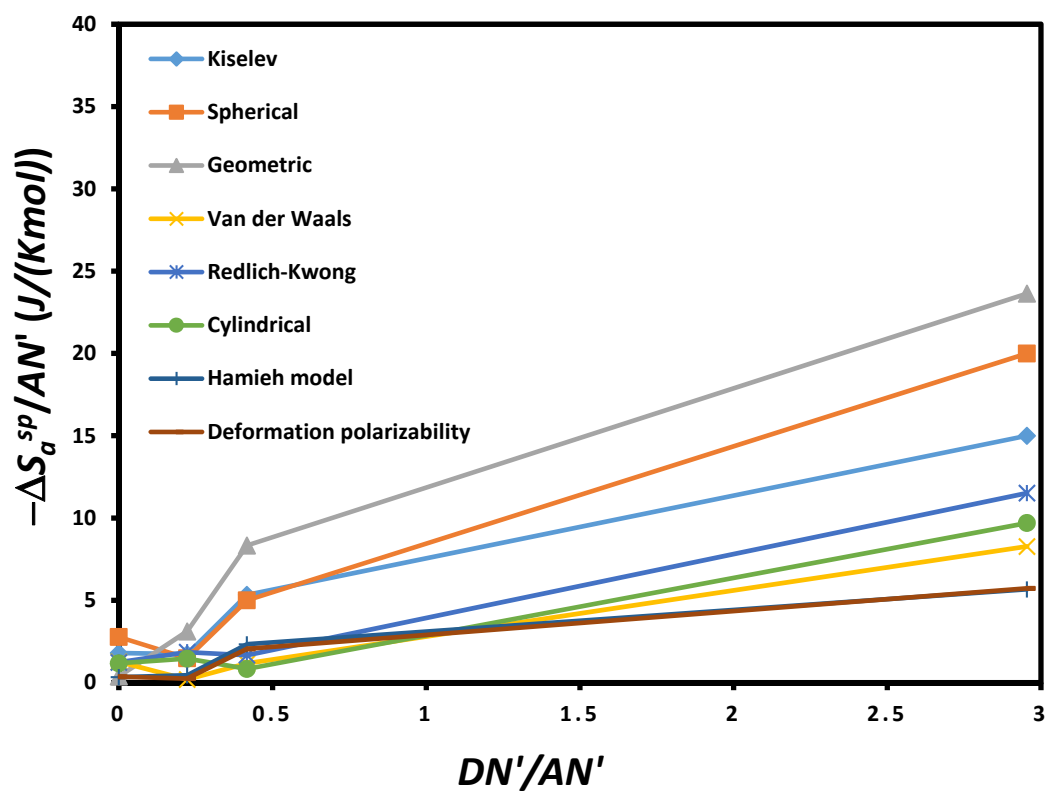

**Figure S9.** Variations of  $\left(\frac{-\Delta S_a^{sp}}{AN'}\right)$  as a function of  $\left(\frac{DN'}{AN'}\right)$  of UiO-66(NH<sub>2</sub>) for different models and IGC methods.
